# Supplementary material
Source: publisher figshare collection journal article supplement (https://gsapubs.figshare.com/ndownloader/files/35999723)
Supplement: Supplementary file 1 [file 35999723]

Table S1. U-Pb zircon geochronology results of Late Archean Wuchuan ultramafic-mafic complex and Paleoproterozoic intrusions.

| Sample Spot | Corrected Isotopic Ratios | | | | | | | | Corrected Ages (Ma) | | | | | | | |
| --- | --- | --- | --- | --- | --- | --- | --- | --- | --- | --- | --- | --- | --- | --- | --- | --- |
| number | 232Th/238U | 1σ | 206Pb/238U | 1σ | 207Pb/235U | 1σ | 207Pb/206Pb | 1σ | 206Pb/238U | 1σ | 207Pb/235U | 1σ | 207Pb/206Pb | 1σ | Best Ages | 1σ |
| plagioclase gneiss sample 19-WC-01(a) | | | | | | | | | | | | | | | | |
| sam.01 | 0.2231 | 0.0016 | 0.4393 | 0.0053 | 10.2790 | 0.2032 | 0.1697 | 0.0031 | 2347 | 28 | 2460 | 49 | 2555 | 30 | 2555 | 30 |
| sam.02 | 0.4805 | 0.0036 | 0.4752 | 0.0059 | 11.0785 | 0.1740 | 0.1691 | 0.0022 | 2506 | 31 | 2530 | 40 | 2549 | 22 | 2549 | 22 |
| sam.03 | 0.4222 | 0.0081 | 0.4710 | 0.0056 | 10.9046 | 0.1671 | 0.1679 | 0.0022 | 2488 | 30 | 2515 | 39 | 2537 | 22 | 2537 | 22 |
| sam.04 | 0.2401 | 0.0028 | 0.4770 | 0.0070 | 10.8573 | 0.7020 | 0.1651 | 0.0105 | 2514 | 37 | 2511 | 162 | 2508 | 107 | 2508 | 107 |
| sam.05 | 0.2479 | 0.0063 | 0.4606 | 0.0062 | 10.9019 | 0.2074 | 0.1717 | 0.0028 | 2442 | 33 | 2515 | 48 | 2574 | 27 | 2574 | 27 |
| sam.06 | 0.2494 | 0.0055 | 0.4621 | 0.0058 | 10.3181 | 0.2206 | 0.1619 | 0.0031 | 2449 | 31 | 2464 | 53 | 2476 | 33 | 2476 | 33 |
| sam.07 | 0.2377 | 0.0023 | 0.4739 | 0.0059 | 10.9629 | 0.2293 | 0.1678 | 0.0032 | 2501 | 31 | 2520 | 53 | 2536 | 32 | 2536 | 32 |
| sam.08 | 0.5636 | 0.0061 | 0.4134 | 0.0049 | 9.1883 | 0.1431 | 0.1612 | 0.0022 | 2231 | 26 | 2357 | 37 | 2468 | 23 | 2468 | 23 |
| sam.09 | 0.6515 | 0.0059 | 0.4469 | 0.0054 | 10.0356 | 0.1872 | 0.1629 | 0.0027 | 2381 | 29 | 2438 | 45 | 2486 | 28 | 2486 | 28 |
| sam.10 | 0.2189 | 0.0014 | 0.4591 | 0.0057 | 10.6180 | 0.1976 | 0.1677 | 0.0028 | 2436 | 30 | 2490 | 46 | 2535 | 28 | 2535 | 28 |
| sam.11 | 0.3235 | 0.0034 | 0.4644 | 0.0073 | 10.6565 | 0.2001 | 0.1664 | 0.0023 | 2459 | 39 | 2494 | 47 | 2522 | 23 | 2522 | 23 |
| sam.12 | 0.3629 | 0.0111 | 0.4567 | 0.0053 | 10.7099 | 0.1643 | 0.1701 | 0.0022 | 2425 | 28 | 2498 | 38 | 2558 | 22 | 2558 | 22 |
| sam.13 | 0.2559 | 0.0047 | 0.4432 | 0.0054 | 10.0211 | 0.1962 | 0.1640 | 0.0030 | 2365 | 29 | 2437 | 48 | 2497 | 30 | 2497 | 30 |
| sam.14 | 0.2305 | 0.0047 | 0.4835 | 0.0063 | 10.9664 | 0.3272 | 0.1645 | 0.0048 | 2543 | 33 | 2520 | 75 | 2502 | 50 | 2502 | 50 |
| sam.15 | 0.1976 | 0.0037 | 0.4407 | 0.0061 | 10.1076 | 0.1734 | 0.1663 | 0.0022 | 2354 | 33 | 2445 | 42 | 2521 | 22 | 2521 | 22 |
| sam.16 | 0.2887 | 0.0019 | 0.4601 | 0.0057 | 10.3199 | 0.1925 | 0.1627 | 0.0027 | 2440 | 30 | 2464 | 46 | 2484 | 28 | 2484 | 28 |
| sam.17 | 0.2338 | 0.0032 | 0.4438 | 0.0055 | 10.2466 | 0.2406 | 0.1675 | 0.0037 | 2368 | 29 | 2457 | 58 | 2532 | 37 | 2532 | 37 |
| sam.18 | 0.3326 | 0.0044 | 0.4801 | 0.0059 | 11.1826 | 0.1754 | 0.1689 | 0.0022 | 2528 | 31 | 2538 | 40 | 2547 | 22 | 2547 | 22 |
| sam.19 | 0.4012 | 0.0052 | 0.4767 | 0.0061 | 11.0661 | 0.1767 | 0.1684 | 0.0022 | 2513 | 32 | 2529 | 40 | 2542 | 22 | 2542 | 22 |
| sam.20 | 0.2324 | 0.0017 | 0.4748 | 0.0061 | 10.7998 | 0.2057 | 0.1650 | 0.0027 | 2505 | 32 | 2506 | 48 | 2507 | 27 | 2507 | 27 |
| sam.21 | 0.2436 | 0.0030 | 0.4774 | 0.0059 | 11.0722 | 0.2429 | 0.1682 | 0.0034 | 2516 | 31 | 2529 | 55 | 2540 | 34 | 2540 | 34 |
| sam.22 | 0.3121 | 0.0023 | 0.4793 | 0.0061 | 11.0761 | 0.1750 | 0.1676 | 0.0022 | 2524 | 32 | 2530 | 40 | 2534 | 22 | 2534 | 22 |
| sam.23 | 0.2442 | 0.0042 | 0.4444 | 0.0055 | 10.1610 | 0.1896 | 0.1658 | 0.0028 | 2370 | 29 | 2450 | 46 | 2516 | 28 | 2516 | 28 |
| sam.24 | 0.4368 | 0.0027 | 0.4621 | 0.0060 | 10.9348 | 0.2511 | 0.1716 | 0.0036 | 2449 | 32 | 2518 | 58 | 2573 | 35 | 2573 | 35 |
| sam.25 | 0.2705 | 0.0024 | 0.4619 | 0.0059 | 10.4988 | 0.2132 | 0.1648 | 0.0031 | 2448 | 31 | 2480 | 50 | 2506 | 31 | 2506 | 31 |
| sam.26 | 0.2067 | 0.0026 | 0.4491 | 0.0058 | 10.3095 | 0.2208 | 0.1665 | 0.0033 | 2391 | 31 | 2463 | 53 | 2523 | 33 | 2523 | 33 |
| sam.27 | 0.2258 | 0.0029 | 0.4275 | 0.0051 | 9.7109 | 0.1868 | 0.1647 | 0.0029 | 2295 | 27 | 2408 | 46 | 2505 | 29 | 2505 | 29 |
| sam.28 | 0.1815 | 0.0015 | 0.4447 | 0.0052 | 10.2640 | 0.1547 | 0.1674 | 0.0022 | 2372 | 28 | 2459 | 37 | 2532 | 22 | 2532 | 22 |
| sam.29 | 0.2401 | 0.0006 | 0.4403 | 0.0067 | 10.1171 | 0.3011 | 0.1667 | 0.0040 | 2352 | 36 | 2446 | 73 | 2524 | 41 | 2524 | 41 |
| sam.30 | 0.2640 | 0.0028 | 0.4725 | 0.0062 | 10.8836 | 0.2572 | 0.1670 | 0.0034 | 2495 | 33 | 2513 | 59 | 2528 | 34 | 2528 | 34 |
| sam.31 | 0.2224 | 0.0015 | 0.4346 | 0.0053 | 9.9898 | 0.1782 | 0.1667 | 0.0026 | 2326 | 29 | 2434 | 43 | 2525 | 26 | 2525 | 26 |
| hornblende pyroxenite sample 19-WC-01(b) | | | | | | | | | | | | | | | | |
| sam.01 | 0.3454 | 0.0027 | 0.4759 | 0.0060 | 11.0240 | 0.2823 | 0.1680 | 0.0031 | 2509 | 32 | 2525 | 65 | 2538 | 31 | 2538 | 31 |
| sam.02 | 0.4048 | 0.0016 | 0.4469 | 0.0056 | 10.2456 | 0.2630 | 0.1663 | 0.0031 | 2381 | 30 | 2457 | 63 | 2521 | 31 | 2521 | 31 |
| sam.03 | 0.0435 | 0.0005 | 0.4740 | 0.0060 | 10.8246 | 0.2748 | 0.1656 | 0.0031 | 2501 | 32 | 2508 | 64 | 2514 | 31 | 2514 | 31 |
| sam.04 | 0.8099 | 0.0056 | 0.4536 | 0.0058 | 10.4445 | 0.2671 | 0.1670 | 0.0031 | 2411 | 31 | 2475 | 63 | 2528 | 32 | 2528 | 32 |
| sam.05 | 0.1769 | 0.0010 | 0.1506 | 0.0019 | 1.4501 | 0.0364 | 0.0698 | 0.0013 | 904 | 11 | 910 | 23 | 924 | 38 | 924 | 38 |
| sam.06 | 0.7425 | 0.0023 | 0.4641 | 0.0060 | 10.7725 | 0.2733 | 0.1684 | 0.0031 | 2457 | 32 | 2504 | 64 | 2541 | 31 | 2541 | 31 |
| sam.07 | 0.5505 | 0.0023 | 0.4594 | 0.0060 | 10.5277 | 0.2698 | 0.1662 | 0.0031 | 2437 | 32 | 2482 | 64 | 2520 | 32 | 2520 | 32 |
| sam.08 | 1.2147 | 0.0067 | 0.4618 | 0.0060 | 10.8302 | 0.2760 | 0.1701 | 0.0032 | 2448 | 32 | 2509 | 64 | 2559 | 31 | 2559 | 31 |
| sam.09 | 0.6957 | 0.0045 | 0.4627 | 0.0084 | 10.5149 | 0.3004 | 0.1648 | 0.0032 | 2451 | 45 | 2481 | 71 | 2506 | 32 | 2506 | 32 |
| sam.10 | 0.0899 | 0.0018 | 0.4600 | 0.0060 | 10.5191 | 0.2644 | 0.1659 | 0.0030 | 2440 | 32 | 2482 | 62 | 2516 | 31 | 2516 | 31 |
| sam.11 | 0.3088 | 0.0024 | 0.4707 | 0.0064 | 10.8654 | 0.2764 | 0.1674 | 0.0031 | 2487 | 34 | 2512 | 64 | 2532 | 31 | 2532 | 31 |
| sam.12 | 0.3169 | 0.0030 | 0.4603 | 0.0059 | 10.3790 | 0.2589 | 0.1635 | 0.0030 | 2441 | 31 | 2469 | 62 | 2492 | 31 | 2492 | 31 |
| sam.13 | 0.5198 | 0.0028 | 0.0433 | 0.0006 | 0.3280 | 0.0093 | 0.0549 | 0.0012 | 273 | 4 | 288 | 8 | 410 | 49 | 273 | 4 |
| sam.14 | 1.1462 | 0.0213 | 0.0442 | 0.0006 | 0.3270 | 0.0205 | 0.0536 | 0.0032 | 279 | 4 | 287 | 18 | 354 | 135 | 279 | 4 |
| sam.15 | 0.0628 | 0.0002 | 0.4481 | 0.0059 | 10.3747 | 0.2646 | 0.1679 | 0.0031 | 2387 | 31 | 2469 | 63 | 2537 | 31 | 2537 | 31 |
| sam.16 | 0.6645 | 0.0032 | 0.4468 | 0.0058 | 10.1746 | 0.2566 | 0.1651 | 0.0031 | 2381 | 31 | 2451 | 62 | 2509 | 31 | 2509 | 31 |
| sam.17 | 0.4592 | 0.0033 | 0.4423 | 0.0055 | 10.1490 | 0.2544 | 0.1664 | 0.0031 | 2361 | 29 | 2448 | 61 | 2522 | 31 | 2522 | 31 |
| sam.18 | 0.5068 | 0.0027 | 0.1513 | 0.0022 | 1.5587 | 0.0403 | 0.0747 | 0.0014 | 908 | 14 | 954 | 25 | 1061 | 37 | 908 | 14 |
| sam.19 | 0.5862 | 0.0060 | 0.4643 | 0.0060 | 10.7846 | 0.2717 | 0.1685 | 0.0031 | 2459 | 32 | 2505 | 63 | 2542 | 31 | 2542 | 31 |
| sam.20 | 0.4121 | 0.0025 | 0.4591 | 0.0059 | 10.8488 | 0.2732 | 0.1714 | 0.0031 | 2435 | 31 | 2510 | 63 | 2571 | 30 | 2571 | 30 |
| sam.21 | 0.4275 | 0.0039 | 0.4426 | 0.0056 | 10.4661 | 0.2615 | 0.1715 | 0.0031 | 2362 | 30 | 2477 | 62 | 2573 | 31 | 2573 | 31 |
| sam.22 | 0.4115 | 0.0039 | 0.0663 | 0.0009 | 0.5247 | 0.0133 | 0.0574 | 0.0011 | 414 | 5 | 428 | 11 | 508 | 40 | 414 | 5 |
| sam.23 | 0.5298 | 0.0050 | 0.0634 | 0.0008 | 0.5092 | 0.0188 | 0.0583 | 0.0019 | 396 | 5 | 418 | 15 | 540 | 71 | 396 | 5 |
| sam.24 | 0.1439 | 0.0016 | 0.4460 | 0.0057 | 10.2349 | 0.2565 | 0.1664 | 0.0031 | 2378 | 30 | 2456 | 62 | 2522 | 31 | 2522 | 31 |
| sam.25 | 0.3643 | 0.0033 | 0.4452 | 0.0056 | 10.1086 | 0.2529 | 0.1647 | 0.0030 | 2374 | 30 | 2445 | 61 | 2504 | 31 | 2504 | 31 |
| sam.26 | 0.4243 | 0.0079 | 0.4384 | 0.0057 | 10.2262 | 0.2592 | 0.1692 | 0.0031 | 2343 | 30 | 2455 | 62 | 2550 | 31 | 2550 | 31 |
| sam.27 | 0.2975 | 0.0044 | 0.4640 | 0.0060 | 10.6809 | 0.2700 | 0.1670 | 0.0031 | 2457 | 32 | 2496 | 63 | 2527 | 31 | 2527 | 31 |
| sam.28 | 0.4260 | 0.0046 | 0.4528 | 0.0057 | 10.2742 | 0.2559 | 0.1646 | 0.0030 | 2408 | 30 | 2460 | 61 | 2503 | 31 | 2503 | 31 |
| sam.29 | 0.1810 | 0.0016 | 0.4279 | 0.0057 | 9.7365 | 0.2494 | 0.1650 | 0.0030 | 2296 | 31 | 2410 | 62 | 2508 | 31 | 2508 | 31 |
| sam.30 | 0.4471 | 0.0112 | 0.4736 | 0.0060 | 10.9164 | 0.2734 | 0.1672 | 0.0030 | 2499 | 32 | 2516 | 63 | 2530 | 31 | 2530 | 31 |
| sam.31 | 0.2848 | 0.0045 | 0.4623 | 0.0059 | 10.7533 | 0.2704 | 0.1687 | 0.0031 | 2450 | 31 | 2502 | 63 | 2545 | 31 | 2545 | 31 |
| sam.32 | 2.4644 | 0.0160 | 0.0200 | 0.0003 | 0.5261 | 0.0187 | 0.1906 | 0.0060 | 128 | 2 | 429 | 15 | 2747 | 51 |  |  |
| sam.33 | 0.3836 | 0.0019 | 0.4743 | 0.0061 | 10.7490 | 0.2717 | 0.1644 | 0.0030 | 2502 | 32 | 2502 | 63 | 2501 | 31 | 2501 | 31 |
| sam.34 | 0.2151 | 0.0054 | 0.4765 | 0.0064 | 10.9130 | 0.2780 | 0.1661 | 0.0030 | 2512 | 34 | 2516 | 64 | 2519 | 31 | 2519 | 31 |
| sam.35 | 0.5172 | 0.0029 | 0.0207 | 0.0003 | 0.1408 | 0.0043 | 0.0493 | 0.0012 | 132 | 2 | 134 | 4 | 160 | 57 | 132 | 2 |
| sam.36 | 0.1443 | 0.0011 | 0.5898 | 0.0075 | 16.3015 | 0.4085 | 0.2005 | 0.0037 | 2989 | 38 | 2895 | 73 | 2830 | 30 | 2830 | 30 |
| sam.37 | 0.1374 | 0.0035 | 0.1527 | 0.0020 | 1.4662 | 0.0374 | 0.0696 | 0.0013 | 916 | 12 | 917 | 23 | 918 | 38 | 916 | 12 |
| sam.38 | 0.6638 | 0.0097 | 0.4704 | 0.0059 | 10.6632 | 0.2718 | 0.1644 | 0.0031 | 2485 | 31 | 2494 | 64 | 2502 | 32 | 2502 | 32 |
| sam.39 | 0.5347 | 0.0017 | 0.0447 | 0.0006 | 0.3366 | 0.0091 | 0.0547 | 0.0011 | 282 | 4 | 295 | 8 | 399 | 46 | 282 | 4 |
| sam.40 | 2.4644 | 0.0070 | 0.0200 | 0.0003 | 0.5261 | 0.0186 | 0.1906 | 0.0059 | 128 | 2 | 429 | 15 | 2747 | 51 |  |  |
| hornblende pyroxenite sample 19-WC-01(c) | | | | | | | | | | | | | | | | |
| sam.01 | 0.5699 | 0.0064 | 0.4591 | 0.0062 | 10.4010 | 0.2462 | 0.1643 | 0.0036 | 2436 | 33 | 2471 | 59 | 2501 | 37 | 2501 | 37 |
| sam.02 | 0.8074 | 0.0057 | 0.3472 | 0.0045 | 5.7575 | 0.1023 | 0.1203 | 0.0017 | 1921 | 25 | 1940 | 34 | 1960 | 25 | 1960 | 25 |
| sam.03 | 0.5061 | 0.0134 | 0.4671 | 0.0065 | 11.0983 | 0.2138 | 0.1723 | 0.0024 | 2471 | 34 | 2531 | 49 | 2580 | 24 | 2580 | 24 |
| sam.04 | 0.4278 | 0.0050 | 0.4790 | 0.0065 | 11.0322 | 0.2168 | 0.1670 | 0.0024 | 2523 | 34 | 2526 | 50 | 2528 | 24 | 2528 | 24 |
| sam.05 | 0.2109 | 0.0036 | 0.4384 | 0.0062 | 10.0402 | 0.2139 | 0.1661 | 0.0025 | 2343 | 33 | 2438 | 52 | 2519 | 25 | 2519 | 25 |
| sam.06 | 1.2085 | 0.0062 | 0.4776 | 0.0065 | 11.1531 | 0.2398 | 0.1694 | 0.0025 | 2517 | 34 | 2536 | 55 | 2551 | 25 | 2551 | 25 |
| sam.07 | 0.1478 | 0.0016 | 0.4624 | 0.0071 | 10.5427 | 0.2260 | 0.1654 | 0.0024 | 2450 | 37 | 2484 | 53 | 2511 | 24 | 2511 | 24 |
| sam.08 | 0.1653 | 0.0091 | 0.3508 | 0.0050 | 7.1297 | 0.1437 | 0.1474 | 0.0021 | 1938 | 28 | 2128 | 43 | 2316 | 24 | 2316 | 24 |
| sam.09 | 0.2815 | 0.0099 | 0.4646 | 0.0060 | 10.9557 | 0.1992 | 0.1710 | 0.0024 | 2460 | 32 | 2519 | 46 | 2568 | 23 | 2568 | 23 |
| sam.10 | 0.6864 | 0.0071 | 0.4663 | 0.0060 | 10.8720 | 0.1900 | 0.1691 | 0.0024 | 2467 | 32 | 2512 | 44 | 2549 | 24 | 2549 | 24 |
| sam.11 | 0.8053 | 0.0034 | 0.4741 | 0.0064 | 10.8719 | 0.1815 | 0.1663 | 0.0023 | 2501 | 34 | 2512 | 42 | 2521 | 23 | 2521 | 23 |
| sam.12 | 0.1918 | 0.0052 | 0.4187 | 0.0054 | 9.5602 | 0.1652 | 0.1656 | 0.0024 | 2255 | 29 | 2393 | 41 | 2513 | 25 | 2513 | 25 |
| sam.13 | 0.9361 | 0.0068 | 0.4724 | 0.0063 | 10.9052 | 0.1805 | 0.1674 | 0.0023 | 2494 | 33 | 2515 | 42 | 2532 | 23 | 2532 | 23 |
| sam.14 | 0.3696 | 0.0014 | 0.4252 | 0.0054 | 9.6691 | 0.1526 | 0.1649 | 0.0023 | 2284 | 29 | 2404 | 38 | 2507 | 23 | 2507 | 23 |
| sam.15 | 0.2228 | 0.0027 | 0.4569 | 0.0059 | 10.5783 | 0.1704 | 0.1679 | 0.0023 | 2426 | 31 | 2487 | 40 | 2537 | 23 | 2537 | 23 |
| sam.16 | 0.1892 | 0.0053 | 0.4498 | 0.0058 | 10.2714 | 0.1685 | 0.1656 | 0.0023 | 2394 | 31 | 2460 | 40 | 2514 | 24 | 2514 | 24 |
| sam.17 | 0.3803 | 0.0187 | 0.4519 | 0.0058 | 10.1102 | 0.1682 | 0.1623 | 0.0023 | 2404 | 31 | 2445 | 41 | 2480 | 24 | 2480 | 24 |
| sam.18 | 0.4609 | 0.0040 | 0.4310 | 0.0056 | 9.8380 | 0.1581 | 0.1655 | 0.0023 | 2310 | 30 | 2420 | 39 | 2513 | 23 | 2513 | 23 |
| sam.19 | 0.2342 | 0.0015 | 0.3097 | 0.0040 | 4.7637 | 0.0790 | 0.1116 | 0.0016 | 1739 | 22 | 1779 | 30 | 1825 | 26 | 1825 | 26 |
| diabase sample 19-WC-01(d) | | | | | | | | | | | | | | | | |
| sam.01 | 0.4620 | 0.0056 | 0.3155 | 0.0036 | 4.9627 | 0.0794 | 0.1141 | 0.0016 | 1768 | 20 | 1813 | 29 | 1865 | 26 | 1865 | 26 |
| sam.02 | 0.3150 | 0.0042 | 0.4447 | 0.0053 | 10.0353 | 0.1635 | 0.1637 | 0.0023 | 2372 | 28 | 2438 | 40 | 2494 | 24 | 2494 | 24 |
| sam.03 | 0.2627 | 0.0021 | 0.3429 | 0.0040 | 5.5206 | 0.0885 | 0.1168 | 0.0016 | 1901 | 22 | 1904 | 31 | 1907 | 25 | 1907 | 25 |
| sam.04 | 0.3438 | 0.0019 | 0.0702 | 0.0008 | 0.5946 | 0.0097 | 0.0614 | 0.0009 | 437 | 5 | 474 | 8 | 655 | 30 | 437 | 5 |
| sam.05 | 0.5639 | 0.0095 | 0.3120 | 0.0036 | 4.8201 | 0.0781 | 0.1121 | 0.0016 | 1750 | 20 | 1788 | 29 | 1833 | 26 | 1833 | 26 |
| sam.06 | 0.0049 | 0.0000 | 0.3266 | 0.0039 | 5.2463 | 0.0864 | 0.1165 | 0.0017 | 1822 | 22 | 1860 | 31 | 1903 | 26 | 1903 | 26 |
| sam.07 | 0.5190 | 0.0084 | 0.0719 | 0.0008 | 0.5619 | 0.0115 | 0.0566 | 0.0011 | 448 | 5 | 453 | 9 | 478 | 43 | 448 | 5 |
| sam.08 | 0.9952 | 0.0052 | 0.0452 | 0.0005 | 0.3265 | 0.0065 | 0.0524 | 0.0010 | 285 | 3 | 287 | 6 | 304 | 42 | 285 | 3 |
| sam.09 | 1.1238 | 0.0094 | 0.0369 | 0.0005 | 0.2656 | 0.0048 | 0.0521 | 0.0010 | 234 | 3 | 239 | 4 | 291 | 43 | 234 | 3 |
| sam.10 | 0.0292 | 0.0004 | 0.3415 | 0.0040 | 5.5414 | 0.0903 | 0.1177 | 0.0017 | 1894 | 22 | 1907 | 31 | 1921 | 25 | 1921 | 25 |
| sam.11 | 0.0273 | 0.0002 | 0.3546 | 0.0042 | 5.8971 | 0.0965 | 0.1206 | 0.0017 | 1956 | 23 | 1961 | 32 | 1965 | 25 | 1965 | 25 |
| sam.12 | 0.3169 | 0.0197 | 0.0444 | 0.0006 | 0.3586 | 0.0072 | 0.0586 | 0.0010 | 280 | 3 | 311 | 6 | 554 | 38 | 280 | 3 |
| sam.13 | 0.2683 | 0.0044 | 0.3486 | 0.0039 | 5.7791 | 0.0916 | 0.1202 | 0.0017 | 1928 | 21 | 1943 | 31 | 1959 | 25 | 1959 | 25 |
| sam.14 | 1.1104 | 0.0080 | 0.3057 | 0.0035 | 4.7978 | 0.0762 | 0.1138 | 0.0016 | 1720 | 20 | 1785 | 28 | 1861 | 25 | 1861 | 25 |
| sam.15 | 0.0628 | 0.0007 | 0.3392 | 0.0038 | 5.3653 | 0.0853 | 0.1147 | 0.0016 | 1883 | 21 | 1879 | 30 | 1876 | 25 | 1876 | 25 |
| sam.16 | 0.0610 | 0.0003 | 0.1983 | 0.0045 | 3.3920 | 0.0774 | 0.1241 | 0.0018 | 1166 | 26 | 1503 | 34 | 2015 | 26 | 2015 | 26 |
| sam.17 | 0.5751 | 0.0048 | 0.0442 | 0.0005 | 0.3212 | 0.0127 | 0.0527 | 0.0021 | 279 | 3 | 283 | 11 | 317 | 89 | 279 | 3 |
| sam.18 | 0.4482 | 0.0041 | 0.0447 | 0.0005 | 0.3294 | 0.0110 | 0.0535 | 0.0017 | 282 | 3 | 289 | 10 | 348 | 73 | 282 | 3 |
| sam.19 | 0.2337 | 0.0014 | 0.0701 | 0.0009 | 0.5395 | 0.0103 | 0.0558 | 0.0009 | 437 | 6 | 438 | 8 | 446 | 34 | 437 | 6 |
| sam.20 | 0.2915 | 0.0079 | 0.0688 | 0.0008 | 0.5270 | 0.0086 | 0.0555 | 0.0008 | 429 | 5 | 430 | 7 | 434 | 32 | 429 | 5 |
| sam.21 | 0.7112 | 0.0062 | 0.4377 | 0.0051 | 9.7910 | 0.1570 | 0.1622 | 0.0023 | 2340 | 27 | 2415 | 39 | 2479 | 24 | 2479 | 24 |
| sam.22 | 0.2922 | 0.0047 | 0.2485 | 0.0093 | 22.5361 | 1.5521 | 0.6577 | 0.1351 | 1431 | 53 | 3207 | 221 | 4641 | 297 | 4641 | 297 |
| sam.23 | 0.1791 | 0.0330 | 0.4369 | 0.0049 | 9.9650 | 0.1574 | 0.1654 | 0.0023 | 2337 | 26 | 2432 | 38 | 2512 | 24 | 2512 | 24 |
| sam.24 | 0.1196 | 0.0008 | 0.2707 | 0.0034 | 4.2393 | 0.0935 | 0.1136 | 0.0024 | 1544 | 20 | 1682 | 37 | 1858 | 38 | 1858 | 38 |
| sam.25 | 0.4902 | 0.0035 | 0.0686 | 0.0008 | 0.5698 | 0.0100 | 0.0603 | 0.0009 | 428 | 5 | 458 | 8 | 613 | 34 | 428 | 5 |
| sam.26 | 0.6242 | 0.0073 | 0.0692 | 0.0008 | 0.5567 | 0.0099 | 0.0584 | 0.0009 | 431 | 5 | 449 | 8 | 544 | 35 | 431 | 5 |
| sam.27 | 1.4167 | 0.0136 | 0.0441 | 0.0005 | 0.3303 | 0.0053 | 0.0543 | 0.0008 | 278 | 3 | 290 | 5 | 384 | 32 | 278 | 3 |
| sam.28 | 0.0996 | 0.0012 | 0.2465 | 0.0029 | 4.0671 | 0.0656 | 0.1197 | 0.0017 | 1420 | 17 | 1648 | 27 | 1951 | 25 | 1951 | 25 |
| sam.29 | 0.3867 | 0.0070 | 0.4799 | 0.0053 | 10.9857 | 0.1745 | 0.1660 | 0.0024 | 2527 | 28 | 2522 | 40 | 2518 | 24 | 2518 | 24 |
| sam.30 | 0.1793 | 0.0065 | 0.2640 | 0.0030 | 4.0703 | 0.0657 | 0.1118 | 0.0016 | 1510 | 17 | 1648 | 27 | 1829 | 26 | 1829 | 26 |
| sam.31 | 0.1997 | 0.0014 | 0.0662 | 0.0007 | 0.4900 | 0.0105 | 0.0537 | 0.0011 | 413 | 5 | 405 | 9 | 359 | 46 | 413 | 5 |
| sam.32 | 0.5473 | 0.0042 | 0.3674 | 0.0042 | 6.3774 | 0.1061 | 0.1259 | 0.0019 | 2017 | 23 | 2029 | 34 | 2042 | 26 | 2042 | 26 |
| sam.33 | 0.4649 | 0.0038 | 0.4006 | 0.0045 | 9.1357 | 0.1497 | 0.1654 | 0.0024 | 2172 | 24 | 2352 | 39 | 2512 | 25 | 2512 | 25 |
| sam.34 | 0.1070 | 0.0029 | 0.2889 | 0.0043 | 4.5665 | 0.0841 | 0.1146 | 0.0017 | 1636 | 24 | 1743 | 32 | 1874 | 26 | 1874 | 26 |
| sam.35 | 0.3539 | 0.0109 | 0.0528 | 0.0006 | 1.2085 | 0.0229 | 0.1661 | 0.0028 | 331 | 4 | 804 | 15 | 2519 | 28 | 331 | 4 |
| sam.36 | 0.1975 | 0.0017 | 0.3096 | 0.0038 | 4.8445 | 0.0820 | 0.1135 | 0.0016 | 1739 | 21 | 1793 | 30 | 1856 | 26 | 1856 | 26 |
| sam.37 | 0.0875 | 0.0024 | 0.3320 | 0.0038 | 5.2641 | 0.0856 | 0.1150 | 0.0016 | 1848 | 21 | 1863 | 30 | 1880 | 26 | 1880 | 26 |
| sam.38 | 0.0331 | 0.0001 | 0.3191 | 0.0035 | 5.0352 | 0.0802 | 0.1144 | 0.0016 | 1785 | 20 | 1825 | 29 | 1871 | 26 | 1871 | 26 |
| sam.39 | 0.1662 | 0.0034 | 0.3252 | 0.0036 | 5.1241 | 0.0819 | 0.1143 | 0.0016 | 1815 | 20 | 1840 | 29 | 1868 | 26 | 1868 | 26 |
| sam.40 | 0.5474 | 0.0076 | 0.3675 | 0.0042 | 6.3621 | 0.1033 | 0.1256 | 0.0018 | 2018 | 23 | 2027 | 33 | 2037 | 25 | 2037 | 25 |
| dunite sample 19-WC-02(a) | | | | | | | | | | | | | | | | |
| sam.01 | 0.8393 | 0.0053 | 0.4482 | 0.0053 | 10.0975 | 0.1575 | 0.1634 | 0.0022 | 2387 | 28 | 2444 | 38 | 2491 | 22 | 2491 | 22 |
| sam.02 | 0.9802 | 0.0048 | 0.4584 | 0.0057 | 10.4578 | 0.1655 | 0.1654 | 0.0022 | 2433 | 30 | 2476 | 39 | 2512 | 22 | 2512 | 22 |
| sam.03 | 0.1246 | 0.0009 | 0.4740 | 0.0058 | 10.7540 | 0.1693 | 0.1646 | 0.0022 | 2501 | 31 | 2502 | 39 | 2503 | 22 | 2503 | 22 |
| sam.04 | 0.3171 | 0.0039 | 0.4117 | 0.0053 | 7.8570 | 0.1290 | 0.1384 | 0.0018 | 2223 | 29 | 2215 | 36 | 2207 | 23 | 2207 | 23 |
| sam.05 | 0.5853 | 0.0041 | 0.4575 | 0.0056 | 10.4608 | 0.1648 | 0.1658 | 0.0022 | 2429 | 30 | 2476 | 39 | 2516 | 22 | 2516 | 22 |
| sam.06 | 0.6639 | 0.0087 | 0.4780 | 0.0056 | 10.8834 | 0.1691 | 0.1651 | 0.0022 | 2518 | 30 | 2513 | 39 | 2509 | 23 | 2509 | 23 |
| sam.07 | 0.4232 | 0.0010 | 0.4593 | 0.0057 | 10.4161 | 0.1668 | 0.1645 | 0.0022 | 2436 | 30 | 2472 | 40 | 2502 | 23 | 2502 | 23 |
| sam.08 | 0.9574 | 0.0059 | 0.4727 | 0.0062 | 10.8070 | 0.1818 | 0.1658 | 0.0023 | 2495 | 33 | 2507 | 42 | 2516 | 23 | 2516 | 23 |
| sam.09 | 0.6478 | 0.0057 | 0.4694 | 0.0058 | 10.6243 | 0.1748 | 0.1642 | 0.0022 | 2481 | 31 | 2491 | 41 | 2499 | 23 | 2499 | 23 |
| sam.10 | 0.5551 | 0.0030 | 0.4625 | 0.0057 | 10.4237 | 0.1731 | 0.1635 | 0.0022 | 2451 | 30 | 2473 | 41 | 2492 | 23 | 2492 | 23 |
| sam.11 | 0.1816 | 0.0015 | 0.4729 | 0.0055 | 10.8311 | 0.1770 | 0.1661 | 0.0022 | 2496 | 29 | 2509 | 41 | 2519 | 23 | 2519 | 23 |
| sam.12 | 0.5729 | 0.0010 | 0.4683 | 0.0058 | 10.4907 | 0.1852 | 0.1625 | 0.0023 | 2476 | 31 | 2479 | 44 | 2482 | 23 | 2482 | 23 |
| sam.13 | 0.6613 | 0.0045 | 0.4311 | 0.0051 | 9.7685 | 0.1735 | 0.1643 | 0.0024 | 2311 | 27 | 2413 | 43 | 2501 | 24 | 2501 | 24 |
| sam.14 | 0.5155 | 0.0064 | 0.4618 | 0.0056 | 10.5628 | 0.1940 | 0.1659 | 0.0023 | 2447 | 30 | 2485 | 46 | 2517 | 23 | 2517 | 23 |
| sam.15 | 0.6748 | 0.0025 | 0.3547 | 0.0043 | 6.1588 | 0.1185 | 0.1259 | 0.0018 | 1957 | 23 | 1999 | 38 | 2042 | 25 | 2042 | 25 |
| sam.16 | 0.7520 | 0.0031 | 0.4711 | 0.0058 | 10.5835 | 0.2118 | 0.1629 | 0.0024 | 2488 | 31 | 2487 | 50 | 2486 | 24 | 2486 | 24 |
| sam.17 | 0.6960 | 0.0062 | 0.4700 | 0.0059 | 10.6453 | 0.2138 | 0.1643 | 0.0024 | 2484 | 31 | 2493 | 50 | 2500 | 24 | 2500 | 24 |
| sam.18 | 0.8557 | 0.0075 | 0.4783 | 0.0059 | 10.9217 | 0.2067 | 0.1656 | 0.0024 | 2520 | 31 | 2516 | 48 | 2514 | 24 | 2514 | 24 |
| sam.19 | 0.6833 | 0.0057 | 0.4551 | 0.0056 | 10.2993 | 0.1855 | 0.1642 | 0.0023 | 2418 | 30 | 2462 | 44 | 2499 | 23 | 2499 | 23 |
| sam.20 | 0.5836 | 0.0032 | 0.4501 | 0.0055 | 10.0958 | 0.1743 | 0.1627 | 0.0022 | 2396 | 29 | 2444 | 42 | 2484 | 23 | 2484 | 23 |
| sam.21 | 0.7850 | 0.0029 | 0.4724 | 0.0056 | 10.6649 | 0.1762 | 0.1638 | 0.0022 | 2494 | 30 | 2494 | 41 | 2495 | 22 | 2495 | 22 |
| sam.22 | 0.5909 | 0.0026 | 0.4750 | 0.0057 | 10.8820 | 0.1751 | 0.1661 | 0.0022 | 2506 | 30 | 2513 | 40 | 2519 | 22 | 2519 | 22 |
| sam.23 | 0.2297 | 0.0008 | 0.4172 | 0.0049 | 8.1871 | 0.1273 | 0.1423 | 0.0019 | 2248 | 27 | 2252 | 35 | 2256 | 23 | 2256 | 23 |
| sam.24 | 0.6901 | 0.0048 | 0.4834 | 0.0058 | 11.3118 | 0.1787 | 0.1697 | 0.0023 | 2542 | 31 | 2549 | 40 | 2555 | 22 | 2555 | 22 |
| sam.25 | 0.6035 | 0.0048 | 0.4375 | 0.0052 | 9.0251 | 0.1393 | 0.1496 | 0.0020 | 2339 | 28 | 2341 | 36 | 2342 | 23 | 2342 | 23 |
| sam.26 | 0.7938 | 0.0034 | 0.4820 | 0.0058 | 10.5870 | 0.1647 | 0.1593 | 0.0021 | 2536 | 31 | 2488 | 39 | 2448 | 22 | 2448 | 22 |
| sam.27 | 0.5833 | 0.0028 | 0.4782 | 0.0059 | 10.5004 | 0.1663 | 0.1592 | 0.0021 | 2520 | 31 | 2480 | 39 | 2448 | 22 | 2448 | 22 |
| sam.28 | 0.6854 | 0.0059 | 0.4078 | 0.0048 | 7.8068 | 0.1203 | 0.1388 | 0.0018 | 2205 | 26 | 2209 | 34 | 2213 | 23 | 2213 | 23 |
| sam.29 | 0.7350 | 0.0062 | 0.4735 | 0.0059 | 10.6471 | 0.1683 | 0.1631 | 0.0021 | 2499 | 31 | 2493 | 39 | 2488 | 22 | 2488 | 22 |
| sam.30 | 0.6907 | 0.0097 | 0.4359 | 0.0053 | 8.9787 | 0.1428 | 0.1494 | 0.0020 | 2332 | 28 | 2336 | 37 | 2339 | 22 | 2339 | 22 |
| sam.31 | 0.1493 | 0.0006 | 0.4738 | 0.0061 | 10.7771 | 0.1743 | 0.1650 | 0.0022 | 2500 | 32 | 2504 | 40 | 2507 | 22 | 2507 | 22 |
| sam.32 | 0.2260 | 0.0042 | 0.4761 | 0.0055 | 10.8766 | 0.1636 | 0.1657 | 0.0022 | 2510 | 29 | 2513 | 38 | 2515 | 22 | 2515 | 22 |
| phlogopite lamprophyre sample 19-WC-02(b) | | | | | | | | | | | | | | | | |
| sam.01 | 2.2389 | 0.0168 | 0.4524 | 0.0053 | 10.0280 | 0.1629 | 0.1608 | 0.0023 | 2406 | 28 | 2437 | 40 | 2464 | 24 | 2464 | 24 |
| sam.02 | 0.1770 | 0.0007 | 0.3120 | 0.0036 | 4.7487 | 0.0757 | 0.1104 | 0.0015 | 1751 | 20 | 1776 | 28 | 1806 | 25 | 1806 | 25 |
| sam.03 | 0.2025 | 0.0010 | 0.4186 | 0.0049 | 8.6691 | 0.1395 | 0.1502 | 0.0021 | 2254 | 26 | 2304 | 37 | 2348 | 23 | 2348 | 23 |
| sam.04 | 0.1361 | 0.0036 | 0.3281 | 0.0040 | 5.3149 | 0.0894 | 0.1175 | 0.0016 | 1829 | 22 | 1871 | 31 | 1918 | 25 | 1918 | 25 |
| sam.05 | 0.1980 | 0.0008 | 0.4202 | 0.0051 | 8.6682 | 0.1422 | 0.1496 | 0.0021 | 2261 | 27 | 2304 | 38 | 2342 | 24 | 2342 | 24 |
| sam.06 | 0.4445 | 0.0033 | 0.3261 | 0.0038 | 5.2242 | 0.0850 | 0.1162 | 0.0016 | 1819 | 21 | 1857 | 30 | 1899 | 25 | 1899 | 25 |
| sam.07 | 0.1622 | 0.0008 | 0.4177 | 0.0052 | 8.6755 | 0.1450 | 0.1506 | 0.0021 | 2250 | 28 | 2305 | 39 | 2353 | 24 | 2353 | 24 |
| sam.08 | 0.3784 | 0.0044 | 0.4517 | 0.0052 | 10.2860 | 0.1663 | 0.1652 | 0.0023 | 2403 | 28 | 2461 | 40 | 2509 | 24 | 2509 | 24 |
| sam.09 | 2.1597 | 0.0139 | 0.0570 | 0.0007 | 0.4168 | 0.0078 | 0.0530 | 0.0009 | 357 | 4 | 354 | 7 | 330 | 39 | 357 | 4 |
| sam.10 | 0.1862 | 0.0005 | 0.3187 | 0.0038 | 4.8814 | 0.0800 | 0.1111 | 0.0015 | 1783 | 21 | 1799 | 29 | 1817 | 25 | 1817 | 25 |
| sam.11 | 0.3151 | 0.0033 | 0.3815 | 0.0050 | 7.3287 | 0.1365 | 0.1393 | 0.0020 | 2083 | 27 | 2152 | 40 | 2219 | 25 | 2219 | 25 |
| sam.12 | 0.3169 | 0.0028 | 0.4232 | 0.0051 | 8.8642 | 0.1434 | 0.1519 | 0.0021 | 2275 | 27 | 2324 | 38 | 2368 | 23 | 2368 | 23 |
| sam.13 | 0.3439 | 0.0012 | 0.3336 | 0.0042 | 5.3126 | 0.0924 | 0.1155 | 0.0016 | 1856 | 23 | 1871 | 33 | 1888 | 25 | 1888 | 25 |
| sam.14 | 0.2306 | 0.0023 | 0.3692 | 0.0043 | 6.4957 | 0.1040 | 0.1276 | 0.0018 | 2026 | 23 | 2045 | 33 | 2065 | 24 | 2065 | 24 |
| sam.15 | 0.0628 | 0.0002 | 0.3124 | 0.0040 | 4.6528 | 0.0796 | 0.1080 | 0.0015 | 1753 | 22 | 1759 | 30 | 1766 | 26 | 1766 | 26 |
| sam.16 | 0.3302 | 0.0011 | 0.3338 | 0.0043 | 5.4294 | 0.0987 | 0.1180 | 0.0017 | 1857 | 24 | 1890 | 34 | 1925 | 26 | 1925 | 26 |
| sam.17 | 0.2423 | 0.0021 | 0.4140 | 0.0051 | 8.5282 | 0.1458 | 0.1494 | 0.0021 | 2233 | 27 | 2289 | 39 | 2339 | 24 | 2339 | 24 |
| sam.18 | 0.2613 | 0.0051 | 0.4449 | 0.0053 | 9.4023 | 0.1523 | 0.1533 | 0.0021 | 2372 | 28 | 2378 | 39 | 2383 | 24 | 2383 | 24 |
| sam.19 | 0.3432 | 0.0017 | 0.4446 | 0.0061 | 9.3323 | 0.1628 | 0.1522 | 0.0021 | 2371 | 32 | 2371 | 41 | 2371 | 23 | 2371 | 23 |
| sam.20 | 0.2163 | 0.0017 | 0.4340 | 0.0051 | 9.2902 | 0.1492 | 0.1553 | 0.0022 | 2324 | 27 | 2367 | 38 | 2405 | 24 | 2405 | 24 |
| sam.21 | 0.1935 | 0.0013 | 0.4304 | 0.0052 | 9.1194 | 0.1512 | 0.1537 | 0.0021 | 2307 | 28 | 2350 | 39 | 2387 | 24 | 2387 | 24 |
| sam.22 | 0.1926 | 5.4370 | 0.0343 | 0.0005 | 0.2394 | 0.0045 | 0.0506 | 0.0008 | 218 | 3 | 218 | 4 | 221 | 38 | 218 | 3 |
| sam.23 | 0.2039 | 0.0042 | 0.4326 | 0.0055 | 9.0636 | 0.1540 | 0.1520 | 0.0021 | 2317 | 30 | 2344 | 40 | 2368 | 24 | 2368 | 24 |
| sam.24 | 0.2389 | 0.0017 | 0.3867 | 0.0048 | 7.6101 | 0.1249 | 0.1427 | 0.0020 | 2108 | 26 | 2186 | 36 | 2260 | 24 | 2260 | 24 |
| sam.25 | 0.2788 | 0.0035 | 0.4058 | 0.0046 | 8.4828 | 0.1376 | 0.1516 | 0.0022 | 2196 | 25 | 2284 | 37 | 2364 | 24 | 2364 | 24 |
| sam.26 | 0.3009 | 0.0041 | 0.4161 | 0.0049 | 8.5979 | 0.1376 | 0.1498 | 0.0021 | 2243 | 26 | 2296 | 37 | 2344 | 24 | 2344 | 24 |
| sam.27 | 0.1376 | 0.0008 | 0.4507 | 0.0055 | 9.8606 | 0.1618 | 0.1587 | 0.0022 | 2398 | 29 | 2422 | 40 | 2442 | 23 | 2442 | 23 |
| sam.28 | 0.1940 | 0.0005 | 0.3140 | 0.0039 | 4.7730 | 0.0808 | 0.1102 | 0.0015 | 1761 | 22 | 1780 | 30 | 1803 | 26 | 1803 | 26 |
| sam.29 | 0.2029 | 0.0046 | 0.4356 | 0.0052 | 9.2559 | 0.1514 | 0.1541 | 0.0021 | 2331 | 28 | 2364 | 39 | 2392 | 24 | 2392 | 24 |
| sam.30 | 0.8717 | 0.0045 | 0.3165 | 0.0038 | 4.8075 | 0.0782 | 0.1102 | 0.0015 | 1773 | 21 | 1786 | 29 | 1802 | 25 | 1802 | 25 |
| sam.31 | 0.1698 | 0.0011 | 0.4304 | 0.0052 | 9.2259 | 0.1516 | 0.1555 | 0.0022 | 2308 | 28 | 2361 | 39 | 2407 | 24 | 2407 | 24 |
| sam.32 | 0.1277 | 0.0002 | 0.3432 | 0.0048 | 5.8057 | 0.1153 | 0.1227 | 0.0018 | 1902 | 27 | 1947 | 39 | 1996 | 26 | 1996 | 26 |
| sam.33 | 0.0414 | 0.0004 | 0.1184 | 0.0043 | 9.5157 | 0.4873 | 0.5827 | 0.0292 | 722 | 26 | 2389 | 122 | 4465 | 73 |  |  |
| sam.34 | 0.2810 | 0.5374 | 0.4146 | 0.0051 | 8.8332 | 0.1479 | 0.1545 | 0.0021 | 2236 | 27 | 2321 | 39 | 2397 | 24 | 2397 | 24 |
| sam.35 | 0.2382 | 0.0011 | 0.4327 | 0.0052 | 9.2604 | 0.1510 | 0.1552 | 0.0021 | 2318 | 28 | 2364 | 39 | 2404 | 23 | 2404 | 23 |
| sam.36 | 0.2270 | 0.0034 | 0.0434 | 0.0005 | 0.3167 | 0.0053 | 0.0529 | 0.0008 | 274 | 3 | 279 | 5 | 326 | 33 | 274 | 3 |
| sam.37 | 0.1156 | 0.0007 | 0.4302 | 0.0051 | 9.0743 | 0.1466 | 0.1530 | 0.0021 | 2307 | 28 | 2346 | 38 | 2380 | 23 | 2380 | 23 |
| sam.38 | 0.4000 | 0.0024 | 0.0434 | 0.0005 | 0.3046 | 0.0126 | 0.0509 | 0.0020 | 274 | 3 | 270 | 11 | 234 | 92 | 274 | 3 |
| sam.39 | 0.4542 | 0.0038 | 0.0571 | 0.0007 | 1.9369 | 0.0444 | 0.2460 | 0.0047 | 358 | 4 | 1094 | 25 | 3159 | 30 |  |  |
| sam.40 | 0.2763 | 0.0012 | 0.4245 | 0.0049 | 9.0446 | 0.1455 | 0.1545 | 0.0021 | 2281 | 26 | 2343 | 38 | 2396 | 23 | 2396 | 23 |
| sam.41 | 0.2865 | 0.0046 | 0.4094 | 0.0055 | 8.5065 | 0.1431 | 0.1507 | 0.0021 | 2212 | 29 | 2287 | 38 | 2354 | 24 | 2354 | 24 |
| sam.42 | 0.2479 | 0.0034 | 0.3764 | 0.0043 | 7.1833 | 0.1156 | 0.1384 | 0.0019 | 2059 | 24 | 2134 | 34 | 2207 | 24 | 2207 | 24 |
| tonalite sample 10-WC-04(a) | | | | | | | | | | | | | | | | |
| sam.01 | 0.8476 | 0.0062 | 0.4822 | 0.0058 | 11.1858 | 0.1745 | 0.1682 | 0.0023 | 2537 | 31 | 2539 | 40 | 2540 | 22 | 2540 | 22 |
| sam.02 | 0.7403 | 0.0090 | 0.4786 | 0.0058 | 11.0408 | 0.1730 | 0.1673 | 0.0022 | 2521 | 31 | 2527 | 40 | 2531 | 23 | 2531 | 23 |
| sam.03 | 1.1418 | 0.0041 | 0.4678 | 0.0056 | 10.6363 | 0.1680 | 0.1649 | 0.0023 | 2474 | 30 | 2492 | 39 | 2507 | 23 | 2507 | 23 |
| sam.04 | 0.8789 | 0.0072 | 0.4790 | 0.0056 | 11.1751 | 0.1726 | 0.1692 | 0.0023 | 2523 | 29 | 2538 | 39 | 2550 | 22 | 2550 | 22 |
| sam.05 | 2.0439 | 0.0272 | 0.4740 | 0.0056 | 10.8083 | 0.1674 | 0.1654 | 0.0022 | 2501 | 30 | 2507 | 39 | 2511 | 23 | 2511 | 23 |
| sam.06 | 1.0702 | 0.0080 | 0.4730 | 0.0057 | 10.9553 | 0.1742 | 0.1680 | 0.0023 | 2497 | 30 | 2519 | 40 | 2538 | 23 | 2538 | 23 |
| sam.07 | 0.7095 | 0.0043 | 0.4777 | 0.0059 | 11.0758 | 0.1757 | 0.1682 | 0.0023 | 2517 | 31 | 2530 | 40 | 2540 | 23 | 2540 | 23 |
| sam.08 | 0.5677 | 0.0053 | 0.4622 | 0.0056 | 10.5677 | 0.1651 | 0.1658 | 0.0022 | 2449 | 29 | 2486 | 39 | 2516 | 23 | 2516 | 23 |
| sam.09 | 0.4965 | 0.0032 | 0.4552 | 0.0058 | 10.3115 | 0.1672 | 0.1643 | 0.0022 | 2418 | 31 | 2463 | 40 | 2500 | 23 | 2500 | 23 |
| sam.10 | 1.0473 | 0.0061 | 0.4767 | 0.0057 | 10.9721 | 0.1773 | 0.1669 | 0.0024 | 2513 | 30 | 2521 | 41 | 2527 | 24 | 2527 | 24 |
| sam.11 | 1.1141 | 0.0109 | 0.4763 | 0.0061 | 10.9280 | 0.1784 | 0.1664 | 0.0023 | 2511 | 32 | 2517 | 41 | 2522 | 23 | 2522 | 23 |
| sam.12 | 1.0098 | 0.0118 | 0.4827 | 0.0062 | 11.2785 | 0.1966 | 0.1695 | 0.0025 | 2539 | 33 | 2546 | 44 | 2553 | 24 | 2553 | 24 |
| sam.13 | 0.2925 | 0.0020 | 0.4812 | 0.0056 | 10.9471 | 0.1671 | 0.1650 | 0.0022 | 2533 | 29 | 2519 | 38 | 2507 | 23 | 2507 | 23 |
| sam.14 | 0.8030 | 0.0100 | 0.4837 | 0.0058 | 11.2245 | 0.1754 | 0.1683 | 0.0023 | 2543 | 30 | 2542 | 40 | 2541 | 23 | 2541 | 23 |
| sam.15 | 1.3743 | 0.0063 | 0.4493 | 0.0055 | 10.3531 | 0.1696 | 0.1671 | 0.0023 | 2392 | 29 | 2467 | 40 | 2529 | 24 | 2529 | 24 |
| sam.16 | 0.7203 | 0.0048 | 0.4787 | 0.0059 | 11.0629 | 0.1781 | 0.1676 | 0.0023 | 2522 | 31 | 2528 | 41 | 2534 | 23 | 2534 | 23 |
| sam.17 | 0.7074 | 0.0052 | 0.4762 | 0.0061 | 11.0789 | 0.1803 | 0.1687 | 0.0023 | 2511 | 32 | 2530 | 41 | 2545 | 23 | 2545 | 23 |
| sam.18 | 0.9641 | 0.0173 | 0.4765 | 0.0058 | 10.9196 | 0.1717 | 0.1662 | 0.0023 | 2512 | 30 | 2516 | 40 | 2520 | 23 | 2520 | 23 |
| sam.19 | 1.5849 | 0.0095 | 0.4842 | 0.0059 | 11.1628 | 0.1751 | 0.1672 | 0.0022 | 2546 | 31 | 2537 | 40 | 2530 | 23 | 2530 | 23 |
| sam.20 | 1.1862 | 0.0082 | 0.4889 | 0.0059 | 11.2092 | 0.1763 | 0.1663 | 0.0023 | 2566 | 31 | 2541 | 40 | 2521 | 23 | 2521 | 23 |
| sam.21 | 0.8998 | 0.0073 | 0.4784 | 0.0059 | 10.9089 | 0.1886 | 0.1654 | 0.0024 | 2520 | 31 | 2515 | 43 | 2511 | 25 | 2511 | 25 |
| sam.22 | 0.6435 | 0.0039 | 0.4572 | 0.0055 | 10.4633 | 0.1621 | 0.1660 | 0.0022 | 2427 | 29 | 2477 | 38 | 2517 | 23 | 2517 | 23 |
| sam.23 | 0.5260 | 0.0046 | 0.4652 | 0.0054 | 10.7335 | 0.1634 | 0.1673 | 0.0022 | 2463 | 28 | 2500 | 38 | 2531 | 22 | 2531 | 22 |
| sam.24 | 0.7090 | 0.0035 | 0.4450 | 0.0052 | 10.3561 | 0.1582 | 0.1688 | 0.0023 | 2373 | 28 | 2467 | 38 | 2546 | 22 | 2546 | 22 |
| pyroxenite xenolith sample 19-WC-04(b) | | | | | | | | | | | | | | | | |
| sam.01 | 0.6597 | 0.0041 | 0.2935 | 0.0040 | 5.6111 | 0.1817 | 0.1386 | 0.0030 | 1659 | 23 | 1918 | 62 | 2210 | 38 | 2210 | 38 |
| sam.02 | 0.3706 | 0.0023 | 0.4671 | 0.0061 | 10.6020 | 0.3364 | 0.1646 | 0.0036 | 2471 | 32 | 2489 | 79 | 2504 | 36 | 2504 | 36 |
| sam.03 | 1.2518 | 0.0043 | 0.3301 | 0.0043 | 7.6645 | 0.2410 | 0.1684 | 0.0036 | 1839 | 24 | 2192 | 69 | 2542 | 36 | 2542 | 36 |
| sam.04 | 0.5518 | 0.0190 | 0.4659 | 0.0061 | 10.8256 | 0.3401 | 0.1685 | 0.0036 | 2466 | 32 | 2508 | 79 | 2543 | 36 | 2543 | 36 |
| sam.05 | 0.4543 | 0.0023 | 0.4631 | 0.0059 | 10.6957 | 0.3335 | 0.1675 | 0.0036 | 2453 | 31 | 2497 | 78 | 2533 | 36 | 2533 | 36 |
| sam.06 | 0.6514 | 0.0015 | 0.3557 | 0.0047 | 7.0555 | 0.2205 | 0.1439 | 0.0031 | 1962 | 26 | 2118 | 66 | 2274 | 37 | 2274 | 37 |
| sam.07 | 0.6986 | 0.0037 | 0.2217 | 0.0029 | 5.4933 | 0.1728 | 0.1797 | 0.0040 | 1291 | 17 | 1900 | 60 | 2650 | 37 | 2650 | 37 |
| sam.08 | 0.4862 | 0.0048 | 0.4367 | 0.0059 | 10.0267 | 0.3144 | 0.1665 | 0.0036 | 2336 | 31 | 2437 | 76 | 2523 | 36 | 2523 | 36 |
| sam.09 | 0.3659 | 0.0021 | 0.4309 | 0.0058 | 9.8166 | 0.3074 | 0.1652 | 0.0035 | 2310 | 31 | 2418 | 76 | 2510 | 36 | 2510 | 36 |
| sam.10 | 0.6967 | 0.0055 | 0.4651 | 0.0064 | 10.8313 | 0.3418 | 0.1689 | 0.0036 | 2462 | 34 | 2509 | 79 | 2547 | 36 | 2547 | 36 |
| sam.11 | 0.4114 | 0.0094 | 0.3835 | 0.0049 | 8.3694 | 0.2606 | 0.1583 | 0.0034 | 2093 | 27 | 2272 | 71 | 2437 | 36 | 2437 | 36 |
| sam.12 | 0.3169 | 0.0052 | 0.4553 | 0.0063 | 10.3985 | 0.3302 | 0.1657 | 0.0035 | 2419 | 33 | 2471 | 78 | 2514 | 36 | 2514 | 36 |
| sam.13 | 0.4177 | 0.0040 | 0.3177 | 0.0045 | 7.1910 | 0.2329 | 0.1641 | 0.0036 | 1779 | 25 | 2135 | 69 | 2499 | 36 | 2499 | 36 |
| sam.14 | 0.7453 | 0.0163 | 0.3315 | 0.0044 | 6.6138 | 0.2091 | 0.1447 | 0.0031 | 1846 | 24 | 2061 | 65 | 2284 | 37 | 2284 | 37 |
| sam.15 | 0.0628 | 0.0003 | 0.4179 | 0.0055 | 8.8454 | 0.2808 | 0.1535 | 0.0033 | 2251 | 29 | 2322 | 74 | 2385 | 37 | 2385 | 37 |
| sam.16 | 0.2191 | 0.0012 | 0.4409 | 0.0056 | 9.5902 | 0.3059 | 0.1577 | 0.0035 | 2355 | 30 | 2396 | 76 | 2432 | 37 | 2432 | 37 |
| sam.17 | 0.5100 | 0.0056 | 0.4654 | 0.0061 | 10.7566 | 0.3436 | 0.1676 | 0.0037 | 2463 | 33 | 2502 | 80 | 2534 | 37 | 2534 | 37 |
| sam.18 | 0.6511 | 0.0028 | 0.4675 | 0.0063 | 10.6422 | 0.3393 | 0.1651 | 0.0036 | 2473 | 33 | 2492 | 79 | 2508 | 36 | 2508 | 36 |
| sam.19 | 2.3517 | 0.0125 | 0.4557 | 0.0058 | 10.4991 | 0.3350 | 0.1671 | 0.0037 | 2420 | 31 | 2480 | 79 | 2529 | 37 | 2529 | 37 |
| sam.20 | 0.5084 | 0.0170 | 0.4606 | 0.0061 | 10.6409 | 0.3343 | 0.1675 | 0.0036 | 2442 | 32 | 2492 | 78 | 2533 | 36 | 2533 | 36 |
| sam.21 | 0.2743 | 0.0011 | 0.3214 | 0.0057 | 5.2698 | 0.1796 | 0.1189 | 0.0025 | 1797 | 32 | 1864 | 64 | 1940 | 38 | 1940 | 38 |
| sam.22 | 0.5731 | 0.0046 | 0.2508 | 0.0033 | 4.5732 | 0.1429 | 0.1322 | 0.0028 | 1443 | 19 | 1744 | 54 | 2128 | 37 | 2128 | 37 |
| sam.23 | 0.3738 | 0.0010 | 0.4253 | 0.0054 | 9.2498 | 0.2866 | 0.1577 | 0.0034 | 2284 | 29 | 2363 | 73 | 2432 | 36 | 2432 | 36 |
| sam.24 | 0.3667 | 0.0027 | 0.4580 | 0.0059 | 10.2073 | 0.3175 | 0.1616 | 0.0034 | 2431 | 31 | 2454 | 76 | 2473 | 36 | 2473 | 36 |
| sam.25 | 0.3667 | 0.0032 | 0.4688 | 0.0060 | 10.7326 | 0.3331 | 0.1660 | 0.0035 | 2479 | 32 | 2500 | 78 | 2518 | 36 | 2518 | 36 |
| sam.26 | 0.3636 | 0.0041 | 0.4764 | 0.0063 | 10.7679 | 0.3351 | 0.1639 | 0.0035 | 2511 | 33 | 2503 | 78 | 2497 | 36 | 2497 | 36 |
| sam.27 | 0.4459 | 0.0053 | 0.4781 | 0.0060 | 10.9568 | 0.3385 | 0.1662 | 0.0035 | 2519 | 32 | 2519 | 78 | 2520 | 36 | 2520 | 36 |
| sam.28 | 0.6920 | 0.0070 | 0.5050 | 0.0063 | 11.5269 | 0.3570 | 0.1655 | 0.0035 | 2635 | 33 | 2567 | 79 | 2513 | 36 | 2513 | 36 |
| sam.29 | 0.4809 | 0.0023 | 0.4601 | 0.0059 | 10.4271 | 0.3228 | 0.1644 | 0.0035 | 2440 | 31 | 2473 | 77 | 2501 | 36 | 2501 | 36 |
| sam.30 | 0.2852 | 0.0041 | 0.4687 | 0.0060 | 10.7065 | 0.3313 | 0.1657 | 0.0035 | 2478 | 32 | 2498 | 77 | 2514 | 36 | 2514 | 36 |
| pyroxenite xenolith sample 19-WC-04(c) | | | | | | | | | | | | | | | | |
| sam.01 | 0.1545 | 0.0016 | 0.3085 | 0.0036 | 4.7723 | 0.0778 | 0.1122 | 0.0016 | 1733 | 20 | 1780 | 29 | 1835 | 26 | 1835 | 26 |
| sam.02 | 0.1529 | 0.0018 | 0.4495 | 0.0052 | 10.2306 | 0.1654 | 0.1651 | 0.0023 | 2393 | 28 | 2456 | 40 | 2508 | 24 | 2508 | 24 |
| sam.03 | 0.5267 | 0.0053 | 0.4753 | 0.1882 | 0.0000 | #DIV/0! | 0.0000 | 0.0000 | 2507 | 993 |  |  |  |  |  |  |
| sam.04 | 0.1728 | 0.1008 | 0.4493 | 0.0052 | 10.2187 | 0.1656 | 0.1649 | 0.0023 | 2392 | 28 | 2455 | 40 | 2507 | 24 | 2507 | 24 |
| sam.05 | 0.2613 | 0.0029 | 0.4403 | 0.0049 | 10.0889 | 0.1601 | 0.1662 | 0.0023 | 2352 | 26 | 2443 | 39 | 2519 | 24 | 2519 | 24 |
| sam.06 | 0.1203 | 0.0003 | 0.4510 | 0.0052 | 10.3627 | 0.1682 | 0.1666 | 0.0024 | 2400 | 28 | 2468 | 40 | 2524 | 24 | 2524 | 24 |
| sam.07 | 0.4895 | 0.0056 | 0.2985 | 0.0039 | 4.6521 | 0.0824 | 0.1130 | 0.0016 | 1684 | 22 | 1759 | 31 | 1849 | 26 | 1849 | 26 |
| sam.08 | 0.4001 | 0.0066 | 0.3063 | 0.0035 | 4.7730 | 0.0770 | 0.1130 | 0.0016 | 1723 | 20 | 1780 | 29 | 1848 | 26 | 1848 | 26 |
| sam.09 | 0.4235 | 0.0043 | 0.0376 | 0.0004 | 0.2818 | 0.0052 | 0.0543 | 0.0010 | 238 | 3 | 252 | 5 | 385 | 40 | 238 | 3 |
| sam.10 | 0.2085 | 0.0018 | 0.4601 | 0.0054 | 10.5288 | 0.1709 | 0.1660 | 0.0023 | 2440 | 28 | 2482 | 40 | 2518 | 24 | 2518 | 24 |
| sam.11 | 0.1655 | 0.0009 | 0.3149 | 0.0037 | 4.8396 | 0.0787 | 0.1115 | 0.0016 | 1765 | 21 | 1792 | 29 | 1823 | 26 | 1823 | 26 |
| sam.12 | 0.3169 | 0.0036 | 0.3162 | 0.0037 | 4.8482 | 0.0792 | 0.1112 | 0.0016 | 1771 | 21 | 1793 | 29 | 1819 | 26 | 1819 | 26 |
| sam.13 | 0.1786 | 0.0029 | 0.2990 | 0.0034 | 4.5614 | 0.0741 | 0.1106 | 0.0016 | 1686 | 19 | 1742 | 28 | 1810 | 26 | 1810 | 26 |
| sam.14 | 0.1241 | 0.0024 | 0.4332 | 0.0048 | 9.6370 | 0.1550 | 0.1613 | 0.0023 | 2320 | 26 | 2401 | 39 | 2470 | 24 | 2470 | 24 |
| sam.15 | 0.0628 | 0.0005 | 0.4486 | 0.0051 | 10.0020 | 0.1639 | 0.1617 | 0.0023 | 2389 | 27 | 2435 | 40 | 2474 | 24 | 2474 | 24 |
| sam.16 | 0.1745 | 0.0022 | 0.4490 | 0.0051 | 9.9527 | 0.1636 | 0.1608 | 0.0023 | 2391 | 27 | 2430 | 40 | 2464 | 25 | 2464 | 25 |
| sam.17 | 0.2626 | 0.0018 | 0.4276 | 0.0048 | 9.5967 | 0.1574 | 0.1628 | 0.0024 | 2295 | 26 | 2397 | 39 | 2485 | 25 | 2485 | 25 |
| sam.18 | 0.3849 | 0.0056 | 0.4581 | 0.0054 | 10.3036 | 0.1714 | 0.1631 | 0.0024 | 2431 | 28 | 2462 | 41 | 2488 | 24 | 2488 | 24 |
| sam.19 | 0.2845 | 0.0028 | 0.4863 | 0.0057 | 11.1986 | 0.2057 | 0.1670 | 0.0025 | 2555 | 30 | 2540 | 47 | 2528 | 25 | 2528 | 25 |
| sam.20 | 0.2168 | 0.0042 | 0.1178 | 0.0015 | 1.6592 | 0.0291 | 0.1022 | 0.0015 | 718 | 9 | 993 | 17 | 1664 | 27 |  |  |
| sam.21 | 0.1780 | 0.0010 | 0.4659 | 0.0055 | 10.5846 | 0.1787 | 0.1648 | 0.0024 | 2465 | 29 | 2487 | 42 | 2505 | 24 | 2505 | 24 |
| sam.22 | 0.3043 | 0.0036 | 0.3224 | 0.0037 | 4.9412 | 0.0835 | 0.1112 | 0.0016 | 1801 | 21 | 1809 | 31 | 1818 | 26 | 1818 | 26 |
| sam.23 | 0.7185 | 0.0018 | 0.4651 | 0.0056 | 10.7282 | 0.1910 | 0.1673 | 0.0025 | 2462 | 29 | 2500 | 45 | 2531 | 25 | 2531 | 25 |
| sam.24 | 1.6892 | 0.0312 | 0.1270 | 0.0015 | 1.3175 | 0.0236 | 0.0753 | 0.0011 | 770 | 9 | 853 | 15 | 1076 | 30 | 770 | 9 |
| sam.25 | 0.7871 | 0.0067 | 0.1566 | 0.0070 | 5.2201 | 0.6352 | 0.2417 | 0.1489 | 938 | 42 | 1856 | 226 | 3131 | 979 |  |  |
| sam.26 | 0.2433 | 0.0040 | 0.4425 | 0.0054 | 10.2155 | 0.1824 | 0.1674 | 0.0024 | 2362 | 29 | 2454 | 44 | 2532 | 24 | 2532 | 24 |
| sam.27 | 0.1703 | 0.0027 | 0.3187 | 0.0036 | 4.9125 | 0.0813 | 0.1118 | 0.0016 | 1783 | 20 | 1804 | 30 | 1829 | 26 | 1829 | 26 |
| sam.28 | 0.2899 | 0.0019 | 0.4749 | 0.0058 | 10.8629 | 0.1862 | 0.1659 | 0.0024 | 2505 | 31 | 2511 | 43 | 2517 | 24 | 2517 | 24 |
| sam.29 | 0.8969 | 0.0107 | 0.0684 | 0.0008 | 0.5677 | 0.0095 | 0.0602 | 0.0009 | 427 | 5 | 457 | 8 | 611 | 32 | 427 | 5 |
| sam.30 | 0.6543 | 0.0090 | 0.1116 | 0.0031 | 1.7982 | 0.2891 | 0.1169 | 0.0252 | 682 | 19 | 1045 | 168 | 1909 | 387 | 1909 | 387 |
| sam.31 | 0.0317 | 0.0002 | 0.2926 | 0.0034 | 4.7540 | 0.0781 | 0.1178 | 0.0017 | 1654 | 19 | 1777 | 29 | 1924 | 25 | 1924 | 25 |
| sam.32 | 0.3876 | 0.0027 | 0.3021 | 0.0036 | 4.6271 | 0.0765 | 0.1111 | 0.0016 | 1702 | 20 | 1754 | 29 | 1817 | 26 | 1817 | 26 |
| sam.33 | 0.5681 | 0.0050 | 0.1943 | 0.0108 | 3.7592 | 1.2261 | 0.1403 | 0.0482 | 1145 | 64 | 1584 | 517 | 2231 | 595 | 2231 | 595 |
| sam.34 | 0.3837 | 0.2673 | 0.3011 | 0.0035 | 4.5911 | 0.0753 | 0.1106 | 0.0016 | 1697 | 20 | 1748 | 29 | 1809 | 26 | 1809 | 26 |
| sam.35 | 0.4353 | 0.0063 | 0.3299 | 0.0036 | 5.1501 | 0.0857 | 0.1132 | 0.0017 | 1838 | 20 | 1844 | 31 | 1852 | 27 | 1852 | 27 |
| sam.36 | 0.2175 | 0.0020 | 0.1239 | 0.0016 | 1.9308 | 0.0495 | 0.1131 | 0.0022 | 753 | 10 | 1092 | 28 | 1849 | 35 |  |  |
| sam.37 | 0.2030 | 0.0014 | 0.1176 | 0.0110 | 2.0505 | 1.1812 | 0.1265 | 0.1799 | 717 | 67 | 1132 | 652 | 2050 | 2512 |  |  |
| sam.38 | 0.7267 | 0.3370 | 0.4437 | 0.2428 | 0.0000 |  | 0.0000 | 0.0000 | 2367 | 1295 |  |  |  |  |  |  |
| sam.39 | 0.2299 | 0.1708 | 0.3035 | 0.0034 | 4.7153 | 0.0753 | 0.1127 | 0.0016 | 1709 | 19 | 1770 | 28 | 1843 | 25 | 1843 | 25 |
| sam.40 | 1.0433 | 0.0236 | 0.4191 | 0.0051 | 9.4732 | 0.1582 | 0.1639 | 0.0023 | 2257 | 27 | 2385 | 40 | 2496 | 24 | 2496 | 24 |
| sam.41 | 0.3287 | 0.0070 | 0.4588 | 0.0052 | 10.4179 | 0.1681 | 0.1647 | 0.0023 | 2434 | 28 | 2473 | 40 | 2504 | 24 | 2504 | 24 |
| sam.42 | 0.5167 | 0.0022 | 0.3843 | 0.0048 | 8.7458 | 0.1517 | 0.1650 | 0.0024 | 2096 | 26 | 2312 | 40 | 2508 | 24 | 2508 | 24 |
| pyroxenite sample 19-WC-03(a) | | | | | | | | | | | | | | | | |
| sam.01 | 0.2847 | 0.0030 | 0.4818 | 0.0058 | 11.0443 | 0.1901 | 0.1662 | 0.0024 | 2535 | 31 | 2527 | 44 | 2520 | 25 | 2520 | 25 |
| sam.02 | 0.3250 | 0.0047 | 0.4523 | 0.0051 | 10.3709 | 0.1732 | 0.1663 | 0.0025 | 2405 | 27 | 2468 | 41 | 2521 | 25 | 2521 | 25 |
| sam.03 | 0.0728 | 0.0009 | 0.4685 | 0.0052 | 10.5804 | 0.1747 | 0.1638 | 0.0024 | 2477 | 27 | 2487 | 41 | 2495 | 25 | 2495 | 25 |
| sam.04 | 0.2085 | 0.0038 | 0.4287 | 0.0062 | 8.7299 | 0.1624 | 0.1477 | 0.0022 | 2300 | 33 | 2310 | 43 | 2320 | 25 | 2320 | 25 |
| sam.05 | 0.3960 | 0.0216 | 0.4825 | 0.0064 | 11.0947 | 0.2036 | 0.1668 | 0.0025 | 2538 | 34 | 2531 | 46 | 2526 | 25 | 2526 | 25 |
| sam.06 | 0.2158 | 0.0069 | 0.3296 | 0.0036 | 5.4935 | 0.0902 | 0.1209 | 0.0018 | 1836 | 20 | 1900 | 31 | 1969 | 27 | 1969 | 27 |
| sam.07 | 0.0436 | 0.0420 | 0.3534 | 0.0042 | 5.7810 | 0.1001 | 0.1186 | 0.0018 | 1951 | 23 | 1944 | 34 | 1936 | 27 | 1936 | 27 |
| sam.08 | 0.6720 | 0.0049 | 0.3432 | 0.0040 | 5.6106 | 0.0960 | 0.1186 | 0.0018 | 1902 | 22 | 1918 | 33 | 1935 | 27 | 1935 | 27 |
| sam.09 | 0.2403 | 0.0025 | 0.4689 | 0.0053 | 10.7437 | 0.1801 | 0.1662 | 0.0025 | 2479 | 28 | 2501 | 42 | 2520 | 25 | 2520 | 25 |
| sam.10 | 0.2140 | 0.0034 | 0.3386 | 0.0039 | 5.6819 | 0.0978 | 0.1217 | 0.0018 | 1880 | 22 | 1929 | 33 | 1981 | 26 | 1981 | 26 |
| sam.11 | 0.3169 | 0.0088 | 0.4479 | 0.0050 | 10.1766 | 0.1726 | 0.1648 | 0.0024 | 2386 | 27 | 2451 | 42 | 2506 | 25 | 2506 | 25 |
| sam.12 | 1.3088 | 0.0248 | 0.4563 | 0.0051 | 10.6472 | 0.1897 | 0.1692 | 0.0026 | 2423 | 27 | 2493 | 44 | 2550 | 26 | 2550 | 26 |
| sam.13 | 0.3180 | 0.0073 | 1.1985 | 0.0433 | 94.7997 | 3.8484 | 0.5737 | 0.0182 | 5078 | 183 | 4632 | 188 | 4443 | 46 |  |  |
| sam.14 | 0.0628 | 0.0198 | 0.3547 | 0.0039 | 5.7844 | 0.1032 | 0.1183 | 0.0018 | 1957 | 21 | 1944 | 35 | 1931 | 28 | 1931 | 28 |
| sam.15 | 0.1337 | 0.0005 | 0.3498 | 0.0040 | 6.0720 | 0.1091 | 0.1259 | 0.0019 | 1934 | 22 | 1986 | 36 | 2041 | 27 | 2041 | 27 |
| sam.16 | 0.0424 | 0.0002 | 0.3348 | 0.0041 | 5.4048 | 0.1002 | 0.1171 | 0.0018 | 1861 | 23 | 1886 | 35 | 1912 | 27 | 1912 | 27 |
| sam.17 | 0.7052 | 0.0141 | 0.4748 | 0.0053 | 11.0217 | 0.1924 | 0.1684 | 0.0025 | 2505 | 28 | 2525 | 44 | 2541 | 25 | 2541 | 25 |
| sam.18 | 0.2767 | 0.0027 | 0.3487 | 0.0039 | 5.6632 | 0.0975 | 0.1178 | 0.0017 | 1928 | 22 | 1926 | 33 | 1923 | 27 | 1923 | 27 |
| sam.19 | 0.5463 | 0.0052 | 0.2491 | 0.0087 | 4.8973 | 0.8257 | 0.1426 |  | 1434 | 50 | 1802 | 304 | 2259 | 20 |  |  |
| sam.20 | 0.3217 | 0.2826 | 0.4649 | 0.0073 | 10.7929 | 0.2416 | 0.1684 | 0.0025 | 2461 | 38 | 2505 | 56 | 2541 | 25 | 2541 | 25 |
| sam.21 | 0.7141 | 0.0124 | 0.3242 | 0.0037 | 5.3205 | 0.0891 | 0.1190 | 0.0018 | 1810 | 20 | 1872 | 31 | 1942 | 26 | 1942 | 26 |
| sam.22 | 0.2749 | 0.0012 | 0.4831 | 0.0057 | 11.3113 | 0.1953 | 0.1698 | 0.0025 | 2541 | 30 | 2549 | 44 | 2556 | 25 | 2556 | 25 |
| sam.23 | 1.8180 | 0.0529 | 0.4659 | 0.0053 | 10.6523 | 0.1832 | 0.1658 | 0.0025 | 2465 | 28 | 2493 | 43 | 2516 | 25 | 2516 | 25 |
| sam.24 | 0.0402 | 0.0003 | 0.3392 | 0.0038 | 5.3906 | 0.0887 | 0.1153 | 0.0017 | 1883 | 21 | 1883 | 31 | 1884 | 26 | 1884 | 26 |
| sam.25 | 0.4018 | 0.0014 | 0.3480 | 0.0039 | 5.7439 | 0.0963 | 0.1197 | 0.0018 | 1925 | 22 | 1938 | 32 | 1952 | 26 | 1952 | 26 |
| sam.26 | 0.6222 | 0.0116 | 2.1282 | 0.1696 | 230.4467 | 17.2345 | 0.7853 | 0.0171 | 7352 | 586 | 5528 | 413 | 4895 | 31 |  |  |
| sam.27 | 0.0948 | 0.0994 | 0.3502 | 0.0040 | 5.8931 | 0.1003 | 0.1220 | 0.0018 | 1936 | 22 | 1960 | 33 | 1986 | 26 | 1986 | 26 |
| sam.28 | 0.0869 | 0.0014 | 0.4455 | 0.0051 | 10.2445 | 0.1710 | 0.1668 | 0.0024 | 2375 | 27 | 2457 | 41 | 2525 | 24 | 2525 | 24 |
| sam.29 | 0.2311 | 0.0010 | 0.0718 | 0.0011 | 0.6788 | 0.0185 | 0.0686 | 0.0013 | 447 | 7 | 526 | 14 | 886 | 40 |  |  |
| sam.30 | 0.3907 | 0.0094 | 0.3908 | 0.0045 | 7.2674 | 0.1254 | 0.1349 | 0.0020 | 2126 | 25 | 2145 | 37 | 2162 | 26 | 2162 | 26 |
| sam.31 | 4.0593 | 0.0255 | 0.1691 | 0.2255 | 17.5727 | 7.8194 | 0.7538 | 0.4884 | 1007 | 1343 | 2967 | 1320 | 4837 | 926 | 4837 | 926 |
| sam.32 | 0.5723 | 4.7476 | 0.3398 | 0.0041 | 5.5522 | 0.0953 | 0.1185 | 0.0017 | 1886 | 23 | 1909 | 33 | 1934 | 26 | 1934 | 26 |
| sam.33 | 0.2531 | 0.0018 | 0.3787 | 0.0044 | 6.7916 | 0.1171 | 0.1301 | 0.0019 | 2070 | 24 | 2085 | 36 | 2099 | 26 | 2099 | 26 |
| sam.34 | 0.2224 | 0.0043 | 0.3406 | 0.0037 | 5.6299 | 0.0915 | 0.1199 | 0.0018 | 1890 | 20 | 1921 | 31 | 1954 | 26 | 1954 | 26 |
| sam.35 | 0.2050 | 0.0013 | 0.3415 | 0.0037 | 5.6786 | 0.0930 | 0.1206 | 0.0018 | 1894 | 21 | 1928 | 32 | 1965 | 26 | 1965 | 26 |
| sam.36 | 0.2211 | 0.0078 | 0.1352 | 0.0025 | 1.3604 | 0.0283 | 0.0730 | 0.0011 | 818 | 15 | 872 | 18 | 1013 | 30 | 818 | 15 |
| sam.37 | 0.4038 | 0.0138 | 0.4162 | 0.0045 | 8.2140 | 0.1345 | 0.1431 | 0.0021 | 2243 | 24 | 2255 | 37 | 2266 | 25 | 2266 | 25 |
| sam.38 | 0.1030 | 0.0004 | 0.3359 | 0.0036 | 5.4312 | 0.0883 | 0.1173 | 0.0017 | 1867 | 20 | 1890 | 31 | 1915 | 26 | 1915 | 26 |
| sam.39 | 1.2905 | 0.0109 | 0.4591 | 0.3707 | 117.4672 | 44.9496 | 1.8557 |  | 2436 | 1967 | 4848 | 1855 | 6092 | 21 |  |  |
| sam.40 | 0.6765 | 0.5396 | 0.3404 | 0.0044 | 5.6687 | 0.1027 | 0.1208 | 0.0018 | 1888 | 25 | 1927 | 35 | 1968 | 26 | 1968 | 26 |
| pyroxenite sample 19-WC-03(b) | | | | | | | | | | | | | | | | |
| sam.01 | 0.8875 | 0.0075 | 0.0329 | 0.0004 | 0.3587 | 0.0112 | 0.0792 | 0.0023 | 208 | 3 | 311 | 10 | 1176 | 58 |  |  |
| sam.02 | 0.0803 | 0.0004 | 0.1100 | 0.0014 | 1.2692 | 0.0239 | 0.0837 | 0.0014 | 673 | 9 | 832 | 16 | 1285 | 32 |  |  |
| sam.03 | 0.4983 | 0.0028 | 0.1681 | 0.0024 | 2.2938 | 0.0450 | 0.0989 | 0.0016 | 1002 | 14 | 1210 | 24 | 1604 | 30 |  |  |
| sam.04 | 0.0848 | 0.0003 | 0.4976 | 0.0061 | 11.4141 | 0.2182 | 0.1664 | 0.0027 | 2604 | 32 | 2558 | 49 | 2521 | 28 | 2521 | 28 |
| sam.05 | 1.1307 | 0.0105 | 0.0755 | 0.0009 | 0.5902 | 0.0143 | 0.0567 | 0.0013 | 469 | 6 | 471 | 11 | 479 | 50 | 469 | 6 |
| sam.06 | 0.0895 | 0.0013 | 0.4627 | 0.0059 | 10.5698 | 0.1969 | 0.1657 | 0.0027 | 2451 | 31 | 2486 | 46 | 2515 | 27 | 2515 | 27 |
| sam.07 | 1.0635 | 0.0042 | 0.4802 | 0.0067 | 11.0090 | 0.2196 | 0.1663 | 0.0028 | 2528 | 36 | 2524 | 50 | 2521 | 28 | 2521 | 28 |
| sam.08 | 0.0686 | 0.0006 | 0.4649 | 0.0058 | 11.0762 | 0.2108 | 0.1728 | 0.0029 | 2461 | 31 | 2530 | 48 | 2585 | 28 | 2585 | 28 |
| sam.09 | 2.6204 | 0.0209 | 0.0633 | 0.0008 | 0.5139 | 0.0126 | 0.0589 | 0.0013 | 395 | 5 | 421 | 10 | 564 | 49 | 395 | 5 |
| sam.10 | 0.8935 | 0.0083 | 0.0616 | 0.0008 | 0.4774 | 0.0167 | 0.0562 | 0.0017 | 386 | 5 | 396 | 14 | 459 | 67 | 386 | 5 |
| sam.11 | 0.6146 | 0.0027 | 0.0385 | 0.0005 | 0.3234 | 0.0072 | 0.0610 | 0.0012 | 243 | 3 | 285 | 6 | 638 | 44 | 243 | 3 |
| sam.12 | 0.6523 | 0.0149 | 0.1304 | 0.0030 | 4.2272 | 0.2541 | 0.2351 | 0.0150 | 790 | 18 | 1679 | 101 | 3087 | 102 |  |  |
| sam.13 | 1.0889 | 0.0093 | 0.1302 | 0.0019 | 1.1983 | 0.0252 | 0.0667 | 0.0011 | 789 | 11 | 800 | 17 | 829 | 34 | 789 | 11 |
| sam.14 | 0.1917 | 0.0028 | 0.4877 | 0.0061 | 11.3660 | 0.2085 | 0.1690 | 0.0027 | 2561 | 32 | 2554 | 47 | 2548 | 27 | 2548 | 27 |
| sam.15 | 0.1242 | 0.0009 | 0.4784 | 0.0059 | 11.6742 | 0.2120 | 0.1770 | 0.0028 | 2520 | 31 | 2579 | 47 | 2625 | 26 | 2625 | 26 |
| sam.16 | 0.2082 | 0.0080 | 0.4288 | 0.0056 | 9.8006 | 0.1880 | 0.1658 | 0.0026 | 2300 | 30 | 2416 | 46 | 2515 | 27 | 2515 | 27 |
| sam.17 | 0.5265 | 0.0174 | 0.2002 | 0.0060 | 3.7733 | 0.4507 | 0.1367 | 0.3022 | 1177 | 35 | 1587 | 190 | 2185 | 3847 |  |  |
| sam.18 | 1.0755 | 0.0170 | 0.0295 | 0.0004 | 0.4200 | 0.0081 | 0.1033 | 0.0018 | 187 | 3 | 356 | 7 | 1684 | 32 |  |  |
| mylonite gneiss sample 19-WC-03(c） | | | | | | | | | | | | | | | | |
| sam.01 | 4.3817 | 0.0318 | 0.4706 | 0.0060 | 10.8149 | 0.1841 | 0.1667 | 0.0024 | 2486 | 31 | 2507 | 43 | 2525 | 24 | 2525 | 24 |
| sam.02 | 1.0693 | 0.0055 | 0.4808 | 0.0060 | 11.0732 | 0.1727 | 0.1670 | 0.0022 | 2531 | 32 | 2529 | 39 | 2528 | 22 | 2528 | 22 |
| sam.03 | 0.4241 | 0.0032 | 0.4782 | 0.0059 | 11.1496 | 0.1731 | 0.1691 | 0.0022 | 2519 | 31 | 2536 | 39 | 2549 | 22 | 2549 | 22 |
| sam.04 | 0.3435 | 0.0008 | 0.4646 | 0.0057 | 10.5387 | 0.1623 | 0.1645 | 0.0021 | 2460 | 30 | 2483 | 38 | 2503 | 22 | 2503 | 22 |
| sam.05 | 2.4897 | 0.0114 | 0.4823 | 0.0064 | 11.2530 | 0.1925 | 0.1692 | 0.0023 | 2537 | 34 | 2544 | 44 | 2550 | 23 | 2550 | 23 |
| sam.06 | 0.7069 | 0.0015 | 0.4709 | 0.0060 | 10.7994 | 0.1751 | 0.1663 | 0.0022 | 2487 | 32 | 2506 | 41 | 2521 | 22 | 2521 | 22 |
| sam.07 | 0.1316 | 0.0011 | 0.4805 | 0.0063 | 10.9903 | 0.1769 | 0.1659 | 0.0022 | 2529 | 33 | 2522 | 41 | 2517 | 22 | 2517 | 22 |
| sam.08 | 4.3358 | 0.0229 | 0.4740 | 0.0059 | 11.2729 | 0.1788 | 0.1725 | 0.0023 | 2501 | 31 | 2546 | 40 | 2582 | 22 | 2582 | 22 |
| sam.09 | 0.3722 | 0.0030 | 0.4756 | 0.0058 | 10.7928 | 0.1649 | 0.1646 | 0.0021 | 2508 | 30 | 2505 | 38 | 2503 | 22 | 2503 | 22 |
| sam.10 | 0.4956 | 0.0010 | 0.4707 | 0.0059 | 11.0069 | 0.1706 | 0.1696 | 0.0022 | 2486 | 31 | 2524 | 39 | 2554 | 22 | 2554 | 22 |
| sam.11 | 0.3027 | 0.0020 | 0.4567 | 0.0056 | 10.5655 | 0.1619 | 0.1678 | 0.0022 | 2425 | 30 | 2486 | 38 | 2536 | 22 | 2536 | 22 |
| sam.12 | 2.7793 | 0.0248 | 0.4489 | 0.0053 | 10.8286 | 0.1690 | 0.1749 | 0.0024 | 2391 | 28 | 2509 | 39 | 2605 | 23 | 2605 | 23 |
| sam.13 | 1.4874 | 0.0062 | 0.4571 | 0.0054 | 10.7101 | 0.1643 | 0.1699 | 0.0023 | 2427 | 29 | 2498 | 38 | 2557 | 22 | 2557 | 22 |
| sam.14 | 3.4560 | 0.0248 | 0.4644 | 0.0057 | 11.1708 | 0.1760 | 0.1744 | 0.0023 | 2459 | 30 | 2537 | 40 | 2601 | 22 | 2601 | 22 |
| sam.15 | 0.1880 | 0.0019 | 0.4555 | 0.0056 | 10.3947 | 0.1600 | 0.1655 | 0.0022 | 2420 | 30 | 2471 | 38 | 2513 | 22 | 2513 | 22 |
| sam.16 | 0.3475 | 0.0031 | 0.4557 | 0.0055 | 10.4494 | 0.1629 | 0.1663 | 0.0022 | 2421 | 29 | 2475 | 39 | 2521 | 22 | 2521 | 22 |
| sam.17 | 0.7710 | 0.0059 | 0.4510 | 0.0055 | 10.2807 | 0.1637 | 0.1653 | 0.0023 | 2400 | 29 | 2460 | 39 | 2511 | 23 | 2511 | 23 |
| sam.18 | 0.3812 | 0.0043 | 0.4567 | 0.0055 | 10.3230 | 0.1587 | 0.1639 | 0.0021 | 2425 | 29 | 2464 | 38 | 2497 | 22 | 2497 | 22 |
| sam.19 | 3.2641 | 0.0610 | 0.4390 | 0.0052 | 10.0888 | 0.1533 | 0.1667 | 0.0022 | 2346 | 28 | 2443 | 37 | 2524 | 22 | 2524 | 22 |
| sam.20 | 0.0553 | 0.0005 | 0.4680 | 0.0056 | 10.6238 | 0.1624 | 0.1647 | 0.0021 | 2475 | 30 | 2491 | 38 | 2504 | 22 | 2504 | 22 |
| sam.21 | 2.1591 | 0.0593 | 0.4602 | 0.0054 | 10.8138 | 0.1707 | 0.1704 | 0.0024 | 2440 | 29 | 2507 | 40 | 2562 | 23 | 2562 | 23 |
| sam.22 | 0.3230 | 0.0034 | 0.4719 | 0.0059 | 10.7711 | 0.1676 | 0.1655 | 0.0022 | 2492 | 31 | 2504 | 39 | 2513 | 22 | 2513 | 22 |
| sam.23 | 0.1341 | 0.0020 | 0.4821 | 0.0057 | 11.0093 | 0.1674 | 0.1656 | 0.0022 | 2536 | 30 | 2524 | 38 | 2514 | 22 | 2514 | 22 |
| sam.24 | 1.5524 | 0.0153 | 0.4871 | 0.0065 | 11.6145 | 0.1944 | 0.1729 | 0.0024 | 2558 | 34 | 2574 | 43 | 2586 | 23 | 2586 | 23 |
| sam.25 | 0.2988 | 0.0012 | 0.4785 | 0.0062 | 11.0333 | 0.1735 | 0.1672 | 0.0022 | 2521 | 32 | 2526 | 40 | 2530 | 22 | 2530 | 22 |
| sam.26 | 1.6500 | 0.0206 | 0.4759 | 0.0064 | 11.1132 | 0.1944 | 0.1694 | 0.0024 | 2510 | 34 | 2533 | 44 | 2551 | 24 | 2551 | 24 |
| sam.27 | 0.4849 | 0.0071 | 0.4803 | 0.0061 | 11.0242 | 0.1730 | 0.1665 | 0.0022 | 2529 | 32 | 2525 | 40 | 2522 | 22 | 2522 | 22 |
| sam.28 | 0.5945 | 0.0046 | 0.4759 | 0.0070 | 10.8637 | 0.1890 | 0.1656 | 0.0022 | 2509 | 37 | 2512 | 44 | 2513 | 22 | 2513 | 22 |
| sam.29 | 0.3639 | 0.0117 | 0.4609 | 0.0054 | 10.8039 | 0.1628 | 0.1700 | 0.0022 | 2444 | 29 | 2506 | 38 | 2558 | 22 | 2558 | 22 |
| sam.30 | 0.2395 | 0.0021 | 0.4829 | 0.0067 | 11.2055 | 0.1903 | 0.1683 | 0.0022 | 2540 | 35 | 2540 | 43 | 2541 | 22 | 2541 | 22 |
| diorite sample 19-WC-08 | | | | | | | | | | | | | | | | |
| sam.01 | 0.4977 | 0.0028 | 0.3428 | 0.0043 | 5.6917 | 0.0908 | 0.1204 | 0.0016 | 1900 | 24 | 1930 | 31 | 1962 | 24 | 1962 | 24 |
| sam.02 | 0.3477 | 0.0017 | 0.3200 | 0.0044 | 5.1734 | 0.1412 | 0.1172 | 0.0030 | 1790 | 25 | 1848 | 50 | 1915 | 46 | 1915 | 46 |
| sam.03 | 0.5838 | 0.0047 | 0.3657 | 0.0048 | 6.2516 | 0.1013 | 0.1240 | 0.0017 | 2009 | 26 | 2012 | 33 | 2014 | 24 | 2014 | 24 |
| sam.04 | 0.4670 | 0.0046 | 0.3642 | 0.0047 | 6.2382 | 0.0991 | 0.1242 | 0.0017 | 2002 | 26 | 2010 | 32 | 2018 | 24 | 2018 | 24 |
| sam.05 | 0.6066 | 0.0049 | 0.3571 | 0.0045 | 6.0149 | 0.1163 | 0.1222 | 0.0021 | 1969 | 25 | 1978 | 38 | 1988 | 31 | 1988 | 31 |
| sam.06 | 0.1612 | 0.0006 | 0.3284 | 0.0046 | 5.2299 | 0.2056 | 0.1155 | 0.0045 | 1831 | 26 | 1858 | 73 | 1888 | 70 | 1888 | 70 |
| sam.07 | 0.6495 | 0.0119 | 0.3591 | 0.0046 | 6.0757 | 0.0980 | 0.1227 | 0.0017 | 1978 | 25 | 1987 | 32 | 1996 | 24 | 1996 | 24 |
| sam.08 | 0.4329 | 0.0029 | 0.3211 | 0.0041 | 4.8592 | 0.0803 | 0.1097 | 0.0015 | 1795 | 23 | 1795 | 30 | 1795 | 26 | 1795 | 26 |
| sam.09 | 0.3129 | 0.0019 | 0.3206 | 0.0042 | 4.9933 | 0.1320 | 0.1130 | 0.0029 | 1793 | 24 | 1818 | 48 | 1848 | 46 | 1848 | 46 |
| sam.10 | 0.6904 | 0.0042 | 0.3544 | 0.0047 | 5.9228 | 0.1049 | 0.1212 | 0.0018 | 1956 | 26 | 1965 | 35 | 1974 | 27 | 1974 | 27 |
| sam.11 | 0.5860 | 0.0030 | 0.3442 | 0.0043 | 5.6376 | 0.0905 | 0.1188 | 0.0016 | 1907 | 24 | 1922 | 31 | 1938 | 25 | 1938 | 25 |
| sam.12 | 0.5839 | 0.0047 | 0.3528 | 0.0044 | 5.9533 | 0.0936 | 0.1224 | 0.0017 | 1948 | 24 | 1969 | 31 | 1991 | 25 | 1991 | 25 |
| sam.13 | 0.7995 | 0.0030 | 0.3489 | 0.0044 | 5.9075 | 0.0932 | 0.1228 | 0.0016 | 1929 | 25 | 1962 | 31 | 1997 | 24 | 1997 | 24 |
| sam.14 | 0.4427 | 0.0021 | 0.3285 | 0.0042 | 5.5646 | 0.1493 | 0.1229 | 0.0031 | 1831 | 24 | 1911 | 51 | 1998 | 45 | 1998 | 45 |
| sam.15 | 0.4331 | 0.0026 | 0.3200 | 0.0039 | 4.8590 | 0.0800 | 0.1087 | 0.0016 | 1798 | 23 | 1792 | 30 | 1795 | 25 | 1795 | 25 |
| sam.16 | 0.3362 | 0.0018 | 0.3637 | 0.0047 | 6.1226 | 0.1187 | 0.1221 | 0.0021 | 2000 | 26 | 1993 | 39 | 1987 | 31 | 1987 | 31 |
| sam.17 | 0.5345 | 0.0037 | 0.3615 | 0.0044 | 6.0580 | 0.0964 | 0.1215 | 0.0017 | 1989 | 24 | 1984 | 32 | 1979 | 25 | 1979 | 25 |
| sam.18 | 0.3663 | 0.0011 | 0.3402 | 0.0043 | 5.7174 | 0.1076 | 0.1219 | 0.0021 | 1888 | 24 | 1934 | 36 | 1984 | 30 | 1984 | 30 |
| sam.19 | 0.5686 | 0.0055 | 0.3547 | 0.0044 | 5.9456 | 0.0937 | 0.1216 | 0.0016 | 1957 | 24 | 1968 | 31 | 1980 | 24 | 1980 | 24 |
| sam.20 | 0.8144 | 0.0028 | 0.3041 | 0.0038 | 4.4716 | 0.0724 | 0.1066 | 0.0015 | 1712 | 21 | 1726 | 28 | 1743 | 25 | 1743 | 25 |
| sam.21 | 0.9120 | 0.0060 | 0.3383 | 0.0042 | 5.5469 | 0.0892 | 0.1189 | 0.0016 | 1879 | 23 | 1908 | 31 | 1940 | 24 | 1940 | 24 |
| sam.22 | 0.1866 | 0.0010 | 0.3277 | 0.0045 | 5.2523 | 0.2172 | 0.1163 | 0.0048 | 1827 | 25 | 1861 | 77 | 1899 | 74 | 1899 | 74 |
| sam.23 | 0.5358 | 0.0074 | 0.3601 | 0.0046 | 5.9619 | 0.1008 | 0.1201 | 0.0017 | 1982 | 25 | 1970 | 33 | 1958 | 25 | 1958 | 25 |
| sam.24 | 0.9052 | 0.0084 | 0.3583 | 0.0045 | 5.9860 | 0.0999 | 0.1212 | 0.0017 | 1974 | 25 | 1974 | 33 | 1974 | 25 | 1974 | 25 |
| sam.25 | 0.5586 | 0.0038 | 0.3539 | 0.0045 | 5.8666 | 0.1026 | 0.1202 | 0.0017 | 1953 | 25 | 1956 | 34 | 1959 | 26 | 1959 | 26 |
| sam.26 | 0.7120 | 0.0044 | 0.3666 | 0.0047 | 6.2642 | 0.1090 | 0.1239 | 0.0018 | 2013 | 26 | 2013 | 35 | 2014 | 25 | 2014 | 25 |
| gabbro dike sample 19-WC-09 | | | | | | | | | | | | | | | | |
| sam.01 | 0.1770 | 0.0007 | 0.3214 | 0.0039 | 5.0535 | 0.0798 | 0.1140 | 0.0015 | 1797 | 22 | 1828 | 29 | 1865 | 24 | 1865 | 24 |
| sam.02 | 0.2390 | 0.0007 | 0.3185 | 0.0045 | 4.9483 | 0.1588 | 0.1127 | 0.0032 | 1782 | 25 | 1811 | 58 | 1843 | 52 | 1843 | 52 |
| sam.03 | 0.6513 | 0.0051 | 0.3703 | 0.0063 | 11.7649 | 0.5341 | 0.2304 | 0.0109 | 2031 | 34 | 2586 | 117 | 3055 | 76 | 3055 | 76 |
| sam.04 | 0.1768 | 0.0015 | 0.3090 | 0.0041 | 4.8208 | 0.0937 | 0.1132 | 0.0018 | 1736 | 23 | 1789 | 35 | 1851 | 29 | 1851 | 29 |
| sam.05 | 0.6008 | 0.0032 | 0.3115 | 0.0042 | 4.8471 | 0.1645 | 0.1129 | 0.0037 | 1748 | 23 | 1793 | 61 | 1846 | 59 | 1846 | 59 |
| sam.06 | 0.3129 | 0.0028 | 0.3276 | 0.0047 | 5.0675 | 0.2433 | 0.1122 | 0.0053 | 1827 | 26 | 1831 | 88 | 1835 | 85 | 1835 | 85 |
| sam.07 | 0.2871 | 0.0025 | 0.3318 | 0.0045 | 5.2750 | 0.1843 | 0.1153 | 0.0038 | 1847 | 25 | 1865 | 65 | 1884 | 60 | 1884 | 60 |
| sam.08 | 0.2729 | 0.0018 | 0.3339 | 0.0051 | 5.2178 | 0.1072 | 0.1134 | 0.0019 | 1857 | 28 | 1856 | 38 | 1854 | 30 | 1854 | 30 |
| sam.09 | 0.2848 | 0.0020 | 0.3497 | 0.0054 | 6.2525 | 0.2484 | 0.1297 | 0.0048 | 1933 | 30 | 2012 | 80 | 2094 | 66 | 2094 | 66 |
| sam.10 | 0.3951 | 0.0044 | 0.3446 | 0.0042 | 5.4951 | 0.1039 | 0.1157 | 0.0019 | 1909 | 24 | 1900 | 36 | 1890 | 30 | 1890 | 30 |
| sam.11 | 0.1386 | 0.0008 | 0.3445 | 0.0043 | 5.4917 | 0.0930 | 0.1156 | 0.0016 | 1908 | 24 | 1899 | 32 | 1889 | 25 | 1889 | 25 |
| sam.12 | 0.3169 | 0.0015 | 0.3486 | 0.0043 | 5.5064 | 0.0941 | 0.1146 | 0.0016 | 1928 | 24 | 1902 | 33 | 1873 | 25 | 1873 | 25 |
| sam.13 | 0.3247 | 0.0026 | 0.3040 | 0.0041 | 4.7302 | 0.1691 | 0.1128 | 0.0038 | 1711 | 23 | 1773 | 63 | 1846 | 61 | 1846 | 61 |
| sam.14 | 0.3109 | 0.0023 | 0.3456 | 0.0049 | 5.3858 | 0.2448 | 0.1130 | 0.0049 | 1913 | 27 | 1883 | 86 | 1849 | 79 | 1849 | 79 |
| sam.15 | 0.0628 | 0.0007 | 0.3275 | 0.0042 | 5.0685 | 0.0973 | 0.1123 | 0.0017 | 1826 | 23 | 1831 | 35 | 1836 | 27 | 1836 | 27 |
| sam.16 | 0.2692 | 0.0018 | 0.3458 | 0.0046 | 5.4793 | 0.1406 | 0.1149 | 0.0026 | 1914 | 25 | 1897 | 49 | 1879 | 40 | 1879 | 40 |
| sam.17 | 0.3885 | 0.0019 | 0.3274 | 0.0041 | 5.1298 | 0.0975 | 0.1136 | 0.0017 | 1826 | 23 | 1841 | 35 | 1858 | 26 | 1858 | 26 |
| sam.18 | 0.3158 | 0.0023 | 0.3333 | 0.0048 | 5.1808 | 0.2745 | 0.1127 | 0.0059 | 1855 | 27 | 1849 | 98 | 1844 | 95 | 1844 | 95 |
| sam.19 | 0.1899 | 0.0018 | 0.3245 | 0.0050 | 5.1107 | 0.4228 | 0.1142 | 0.0093 | 1812 | 28 | 1838 | 152 | 1868 | 146 | 1868 | 146 |
| sam.20 | 0.3563 | 0.0080 | 0.3310 | 0.0041 | 5.1362 | 0.1030 | 0.1125 | 0.0016 | 1843 | 23 | 1842 | 37 | 1841 | 26 | 1841 | 26 |
| sam.21 | 0.3250 | 0.0049 | 0.3322 | 0.0048 | 5.1677 | 0.2216 | 0.1128 | 0.0046 | 1849 | 27 | 1847 | 79 | 1845 | 73 | 1845 | 73 |
| sam.22 | 0.3193 | 0.0029 | 0.3235 | 0.0041 | 5.1013 | 0.1204 | 0.1144 | 0.0020 | 1807 | 23 | 1836 | 43 | 1870 | 32 | 1870 | 32 |
| sam.23 | 0.2743 | 0.0025 | 0.3259 | 0.0047 | 5.0364 | 0.2334 | 0.1121 | 0.0050 | 1819 | 26 | 1825 | 85 | 1833 | 81 | 1833 | 81 |
| sam.24 | 0.2303 | 0.0062 | 0.3466 | 0.0047 | 5.3874 | 0.1316 | 0.1127 | 0.0017 | 1919 | 26 | 1883 | 46 | 1844 | 27 | 1844 | 27 |
| sam.25 | 0.3413 | 0.0025 | 0.3466 | 0.0048 | 5.4954 | 0.2338 | 0.1150 | 0.0045 | 1918 | 26 | 1900 | 81 | 1880 | 70 | 1880 | 70 |
| sam.26 | 0.1915 | 0.0014 | 0.3426 | 0.0048 | 5.3498 | 0.1130 | 0.1132 | 0.0016 | 1899 | 26 | 1877 | 40 | 1852 | 26 | 1852 | 26 |
| sam.27 | 0.3736 | 0.0061 | 0.3526 | 0.0046 | 5.5201 | 0.1504 | 0.1135 | 0.0027 | 1947 | 25 | 1904 | 52 | 1857 | 43 | 1857 | 43 |
| sam.28 | 0.3828 | 0.0018 | 0.3451 | 0.0042 | 5.5933 | 0.1043 | 0.1176 | 0.0017 | 1911 | 23 | 1915 | 36 | 1919 | 26 | 1919 | 26 |
| sam.29 | 0.9568 | 0.0067 | 0.3494 | 0.0046 | 5.4837 | 0.1504 | 0.1138 | 0.0028 | 1932 | 26 | 1898 | 52 | 1861 | 45 | 1861 | 45 |
| sam.30 | 0.2207 | 0.0009 | 0.3482 | 0.0050 | 5.5556 | 0.1025 | 0.1157 | 0.0016 | 1926 | 28 | 1909 | 35 | 1891 | 24 | 1891 | 24 |
| sam.31 | 0.0900 | 0.0015 | 0.3854 | 0.0047 | 8.9492 | 0.1533 | 0.1684 | 0.0024 | 2101 | 26 | 2333 | 40 | 2542 | 24 | 2542 | 24 |
| sam.32 | 0.5196 | 0.0053 | 0.3321 | 0.0045 | 5.2565 | 0.1481 | 0.1148 | 0.0030 | 1849 | 25 | 1862 | 52 | 1877 | 47 | 1877 | 47 |
| sam.33 | 0.5396 | 0.0047 | 0.3374 | 0.0045 | 5.3084 | 0.1021 | 0.1141 | 0.0019 | 1874 | 25 | 1870 | 36 | 1866 | 30 | 1866 | 30 |
| sam.34 | 0.5180 | 0.0049 | 0.3419 | 0.0042 | 5.4030 | 0.0965 | 0.1146 | 0.0018 | 1896 | 23 | 1885 | 34 | 1874 | 29 | 1874 | 29 |
| sam.35 | 0.7373 | 0.0039 | 0.3887 | 0.0057 | 7.1271 | 0.4635 | 0.1330 | 0.0085 | 2117 | 31 | 2127 | 138 | 2138 | 112 | 2138 | 112 |
| sam.36 | 0.4333 | 0.0035 | 0.3398 | 0.0041 | 5.3919 | 0.0843 | 0.1151 | 0.0015 | 1886 | 23 | 1884 | 29 | 1881 | 24 | 1881 | 24 |
| sam.37 | 0.3683 | 0.0052 | 0.3346 | 0.0042 | 5.2645 | 0.0833 | 0.1141 | 0.0015 | 1861 | 23 | 1863 | 29 | 1866 | 24 | 1866 | 24 |
| sam.38 | 0.1258 | 0.0006 | 0.3447 | 0.0047 | 5.5138 | 0.0932 | 0.1160 | 0.0015 | 1909 | 26 | 1903 | 32 | 1896 | 24 | 1896 | 24 |
| sam.39 | 0.4023 | 0.0040 | 0.3434 | 0.0045 | 5.4305 | 0.2076 | 0.1147 | 0.0042 | 1903 | 25 | 1890 | 72 | 1875 | 66 | 1875 | 66 |
| sam.40 | 0.5208 | 0.0040 | 0.3321 | 0.0044 | 5.2344 | 0.1469 | 0.1143 | 0.0030 | 1849 | 25 | 1858 | 52 | 1869 | 47 | 1869 | 47 |
| garnet-bearing plagioclase granite sample 19-WC-11 | | | | | | | | | | | | | | | | |
| sam.01 | 0.0856 | 0.0015 | 0.3343 | 0.0041 | 5.2272 | 0.0803 | 0.1134 | 0.0015 | 1859 | 23 | 1857 | 29 | 1855 | 24 | 1855 | 24 |
| sam.02 | 0.0859 | 0.0015 | 0.3385 | 0.0042 | 5.3559 | 0.0831 | 0.1148 | 0.0015 | 1879 | 23 | 1878 | 29 | 1876 | 24 | 1876 | 24 |
| sam.03 | 0.0984 | 0.0017 | 0.3492 | 0.0042 | 6.0249 | 0.0922 | 0.1251 | 0.0017 | 1931 | 23 | 1979 | 30 | 2031 | 24 | 2031 | 24 |
| sam.04 | 0.0929 | 0.0017 | 0.3415 | 0.0042 | 5.4684 | 0.0836 | 0.1161 | 0.0015 | 1894 | 23 | 1896 | 29 | 1897 | 24 | 1897 | 24 |
| sam.05 | 0.1288 | 0.0025 | 0.5018 | 0.0072 | 12.3185 | 0.2151 | 0.1780 | 0.0024 | 2622 | 37 | 2629 | 46 | 2635 | 22 | 2635 | 22 |
| sam.06 | 0.0081 | 0.0002 | 0.2922 | 0.0038 | 4.6070 | 0.0740 | 0.1144 | 0.0015 | 1652 | 21 | 1751 | 28 | 1870 | 24 | 1870 | 24 |
| sam.07 | 0.0720 | 0.0016 | 0.3345 | 0.0042 | 5.2297 | 0.0824 | 0.1134 | 0.0015 | 1860 | 23 | 1857 | 29 | 1855 | 24 | 1855 | 24 |
| sam.08 | 0.0850 | 0.0020 | 0.3370 | 0.0043 | 5.3311 | 0.0849 | 0.1147 | 0.0015 | 1872 | 24 | 1874 | 30 | 1876 | 24 | 1876 | 24 |
| sam.09 | 0.0190 | 0.0004 | 0.3272 | 0.0043 | 5.0587 | 0.0818 | 0.1121 | 0.0015 | 1825 | 24 | 1829 | 30 | 1834 | 24 | 1834 | 24 |
| sam.10 | 0.0600 | 0.0011 | 0.3152 | 0.0038 | 4.9574 | 0.0753 | 0.1141 | 0.0015 | 1766 | 21 | 1812 | 28 | 1865 | 24 | 1865 | 24 |
| sam.11 | 0.0700 | 0.0013 | 0.3170 | 0.0038 | 4.9377 | 0.0749 | 0.1130 | 0.0015 | 1775 | 21 | 1809 | 27 | 1848 | 24 | 1848 | 24 |
| sam.12 | 0.0832 | 0.0015 | 0.3346 | 0.0044 | 5.2295 | 0.0841 | 0.1133 | 0.0015 | 1861 | 24 | 1857 | 30 | 1854 | 24 | 1854 | 24 |
| sam.13 | 0.0018 | 0.0000 | 0.3325 | 0.0042 | 5.2914 | 0.0819 | 0.1154 | 0.0015 | 1851 | 23 | 1867 | 29 | 1886 | 24 | 1886 | 24 |
| sam.14 | 0.0900 | 0.0018 | 0.3661 | 0.0045 | 6.4033 | 0.0992 | 0.1269 | 0.0017 | 2011 | 25 | 2033 | 31 | 2055 | 23 | 2055 | 23 |
| sam.15 | 0.0800 | 0.0017 | 0.3236 | 0.0041 | 5.0893 | 0.0803 | 0.1141 | 0.0015 | 1807 | 23 | 1834 | 29 | 1865 | 24 | 1865 | 24 |
| sam.16 | 0.0877 | 0.0021 | 0.3153 | 0.0048 | 5.4470 | 0.0976 | 0.1253 | 0.0017 | 1767 | 27 | 1892 | 34 | 2033 | 24 | 2033 | 24 |
| sam.17 | 0.0679 | 0.0017 | 0.2833 | 0.0035 | 4.7575 | 0.0744 | 0.1218 | 0.0016 | 1608 | 20 | 1777 | 28 | 1983 | 24 | 1983 | 24 |
| sam.18 | 0.0800 | 0.0016 | 0.3306 | 0.0041 | 5.1880 | 0.0807 | 0.1138 | 0.0015 | 1841 | 23 | 1851 | 29 | 1861 | 24 | 1861 | 24 |
| sam.19 | 0.0896 | 0.0017 | 0.3044 | 0.0037 | 5.2410 | 0.0802 | 0.1249 | 0.0016 | 1713 | 21 | 1859 | 28 | 2027 | 23 | 2027 | 23 |
| sam.20 | 0.0970 | 0.0018 | 0.3570 | 0.0047 | 6.2455 | 0.1012 | 0.1269 | 0.0017 | 1968 | 26 | 2011 | 33 | 2055 | 23 | 2055 | 23 |
| sam.21 | 0.0580 | 0.0010 | 0.3086 | 0.0038 | 4.8384 | 0.0752 | 0.1137 | 0.0015 | 1734 | 22 | 1792 | 28 | 1860 | 24 | 1860 | 24 |
| sam.22 | 0.0800 | 0.0019 | 0.3250 | 0.0043 | 5.0923 | 0.0821 | 0.1136 | 0.0015 | 1814 | 24 | 1835 | 30 | 1859 | 24 | 1859 | 24 |
| sam.23 | 0.1077 | 0.0028 | 0.3302 | 0.0043 | 5.6500 | 0.0901 | 0.1241 | 0.0016 | 1839 | 24 | 1924 | 31 | 2016 | 24 | 2016 | 24 |
| gabbro sample 19-WC-12(a) | | | | | | | | | | | | | | | | |
| sam.01 | 0.0756 | 0.0027 | 0.3443 | 0.0046 | 5.5080 | 0.0923 | 0.1160 | 0.0016 | 1907 | 26 | 1902 | 32 | 1896 | 25 | 1896 | 25 |
| sam.02 | 0.0570 | 0.0018 | 0.3425 | 0.0048 | 5.3874 | 0.1074 | 0.1141 | 0.0018 | 1899 | 27 | 1883 | 38 | 1866 | 29 | 1866 | 29 |
| sam.03 | 0.0755 | 0.0025 | 0.3448 | 0.0045 | 5.5724 | 0.0922 | 0.1172 | 0.0016 | 1910 | 25 | 1912 | 32 | 1914 | 25 | 1914 | 25 |
| sam.04 | 0.0699 | 0.0022 | 0.3403 | 0.0045 | 5.3945 | 0.0893 | 0.1150 | 0.0016 | 1888 | 25 | 1884 | 31 | 1879 | 25 | 1879 | 25 |
| sam.05 | 0.1150 | 0.0056 | 0.3452 | 0.0045 | 5.3185 | 0.0874 | 0.1117 | 0.0016 | 1912 | 25 | 1872 | 31 | 1828 | 25 | 1828 | 25 |
| sam.06 | 0.0600 | 0.0019 | 0.3326 | 0.0044 | 5.1510 | 0.0912 | 0.1123 | 0.0017 | 1851 | 25 | 1845 | 33 | 1837 | 27 | 1837 | 27 |
| sam.07 | 0.0649 | 0.0022 | 0.3424 | 0.0044 | 5.4832 | 0.0899 | 0.1161 | 0.0016 | 1898 | 24 | 1898 | 31 | 1898 | 25 | 1898 | 25 |
| sam.08 | 0.0640 | 0.0024 | 0.3405 | 0.0046 | 5.3201 | 0.0897 | 0.1133 | 0.0016 | 1889 | 25 | 1872 | 32 | 1853 | 26 | 1853 | 26 |
| sam.09 | 0.0650 | 0.0019 | 0.3437 | 0.0044 | 5.5787 | 0.0901 | 0.1177 | 0.0016 | 1905 | 24 | 1913 | 31 | 1922 | 25 | 1922 | 25 |
| sam.10 | 0.0620 | 0.0017 | 0.3237 | 0.0043 | 4.9770 | 0.0963 | 0.1115 | 0.0019 | 1808 | 24 | 1815 | 35 | 1824 | 31 | 1824 | 31 |
| sam.11 | 0.0825 | 0.0034 | 0.3440 | 0.0044 | 5.6189 | 0.0927 | 0.1185 | 0.0017 | 1906 | 24 | 1919 | 32 | 1933 | 25 | 1933 | 25 |
| sam.12 | 0.0795 | 0.0020 | 0.3450 | 0.0044 | 5.5636 | 0.0902 | 0.1170 | 0.0016 | 1911 | 24 | 1910 | 31 | 1910 | 25 | 1910 | 25 |
| sam.13 | 0.0750 | 0.0019 | 0.3293 | 0.0043 | 5.1378 | 0.0894 | 0.1132 | 0.0017 | 1835 | 24 | 1842 | 32 | 1851 | 27 | 1851 | 27 |
| sam.14 | 0.0908 | 0.0024 | 0.3426 | 0.0043 | 5.4315 | 0.0867 | 0.1150 | 0.0016 | 1899 | 24 | 1890 | 30 | 1880 | 25 | 1880 | 25 |
| sam.15 | 0.0703 | 0.0021 | 0.3352 | 0.0043 | 5.3207 | 0.0877 | 0.1151 | 0.0016 | 1864 | 24 | 1872 | 31 | 1882 | 25 | 1882 | 25 |
| sam.16 | 0.0909 | 0.0028 | 0.3426 | 0.0043 | 5.4081 | 0.0906 | 0.1145 | 0.0017 | 1899 | 24 | 1886 | 32 | 1872 | 26 | 1872 | 26 |
| sam.17 | 0.0179 | 0.0007 | 0.3347 | 0.0042 | 5.2224 | 0.0870 | 0.1132 | 0.0016 | 1861 | 23 | 1856 | 31 | 1851 | 26 | 1851 | 26 |
| sam.18 | 0.0949 | 0.0025 | 0.3275 | 0.0042 | 5.0915 | 0.0834 | 0.1128 | 0.0016 | 1826 | 23 | 1835 | 30 | 1844 | 25 | 1844 | 25 |
| sam.19 | 0.0789 | 0.0020 | 0.3367 | 0.0043 | 5.3232 | 0.0862 | 0.1147 | 0.0016 | 1871 | 24 | 1873 | 30 | 1875 | 25 | 1875 | 25 |
| sam.20 | 0.0789 | 0.0019 | 0.3412 | 0.0044 | 5.4534 | 0.0886 | 0.1159 | 0.0016 | 1893 | 24 | 1893 | 31 | 1894 | 25 | 1894 | 25 |
| sam.21 | 0.1194 | 0.0035 | 0.3431 | 0.0044 | 5.5488 | 0.0913 | 0.1173 | 0.0017 | 1901 | 24 | 1908 | 31 | 1916 | 25 | 1916 | 25 |
| sam.22 | 0.1030 | 0.0023 | 0.3375 | 0.0042 | 5.3193 | 0.0863 | 0.1143 | 0.0016 | 1875 | 24 | 1872 | 30 | 1869 | 25 | 1869 | 25 |
| sam.23 | 0.1386 | 0.0033 | 0.3572 | 0.0046 | 5.9806 | 0.1097 | 0.1214 | 0.0020 | 1969 | 25 | 1973 | 36 | 1977 | 30 | 1977 | 30 |
| sam.24 | 0.1300 | 0.0029 | 0.3378 | 0.0043 | 5.3158 | 0.0857 | 0.1141 | 0.0016 | 1876 | 24 | 1871 | 30 | 1866 | 25 | 1866 | 25 |
| sam.25 | 0.1515 | 0.0034 | 0.3476 | 0.0044 | 5.7694 | 0.0937 | 0.1204 | 0.0017 | 1923 | 24 | 1942 | 32 | 1962 | 25 | 1962 | 25 |
| biotite syenogranite sample 19-WC-12(b) | | | | | | | | | | | | | | | | |
| sam.01 | 0.6871 | 0.0029 | 0.3336 | 0.0047 | 5.2225 | 0.0906 | 0.1135 | 0.0016 | 1856 | 26 | 1856 | 32 | 1857 | 26 | 1857 | 26 |
| sam.02 | 0.4050 | 0.0013 | 0.3313 | 0.0045 | 5.1352 | 0.0884 | 0.1124 | 0.0016 | 1844 | 25 | 1842 | 32 | 1839 | 26 | 1839 | 26 |
| sam.03 | 0.2868 | 0.0024 | 0.3255 | 0.0043 | 5.0262 | 0.0846 | 0.1120 | 0.0016 | 1816 | 24 | 1824 | 31 | 1832 | 26 | 1832 | 26 |
| sam.04 | 0.8516 | 0.0039 | 0.3304 | 0.0047 | 5.1023 | 0.0905 | 0.1120 | 0.0016 | 1840 | 26 | 1836 | 33 | 1832 | 26 | 1832 | 26 |
| sam.05 | 0.5237 | 0.0144 | 0.3333 | 0.0045 | 5.1831 | 0.0886 | 0.1128 | 0.0016 | 1854 | 25 | 1850 | 32 | 1845 | 26 | 1845 | 26 |
| sam.06 | 0.3245 | 0.0044 | 0.3323 | 0.0045 | 5.1614 | 0.0887 | 0.1126 | 0.0016 | 1850 | 25 | 1846 | 32 | 1842 | 26 | 1842 | 26 |
| sam.07 | 0.3500 | 0.0031 | 0.3331 | 0.0046 | 5.1720 | 0.0890 | 0.1126 | 0.0016 | 1853 | 25 | 1848 | 32 | 1842 | 26 | 1842 | 26 |
| sam.08 | 0.4231 | 0.0046 | 0.3349 | 0.0045 | 5.2495 | 0.0903 | 0.1137 | 0.0017 | 1862 | 25 | 1861 | 32 | 1859 | 26 | 1859 | 26 |
| sam.09 | 0.3627 | 0.0013 | 0.3295 | 0.0044 | 5.0842 | 0.0858 | 0.1119 | 0.0016 | 1836 | 24 | 1833 | 31 | 1831 | 26 | 1831 | 26 |
| sam.10 | 0.4729 | 0.0011 | 0.3290 | 0.0044 | 5.0856 | 0.0856 | 0.1121 | 0.0016 | 1834 | 24 | 1834 | 31 | 1834 | 26 | 1834 | 26 |
| sam.11 | 0.3404 | 0.0015 | 0.3192 | 0.0042 | 4.9475 | 0.0825 | 0.1124 | 0.0016 | 1786 | 23 | 1810 | 30 | 1839 | 26 | 1839 | 26 |
| sam.12 | 0.3088 | 0.0023 | 0.3183 | 0.0042 | 4.8608 | 0.0817 | 0.1108 | 0.0016 | 1781 | 23 | 1795 | 30 | 1812 | 26 | 1812 | 26 |
| sam.13 | 1.0908 | 0.0043 | 0.3261 | 0.0043 | 5.1040 | 0.0862 | 0.1135 | 0.0016 | 1820 | 24 | 1837 | 31 | 1856 | 26 | 1856 | 26 |
| sam.14 | 0.7635 | 0.0044 | 0.2182 | 0.0029 | 3.7757 | 0.0634 | 0.1255 | 0.0018 | 1272 | 17 | 1588 | 27 | 2036 | 25 | 2036 | 25 |
| sam.15 | 1.5095 | 0.0055 | 0.3125 | 0.0041 | 4.6925 | 0.0802 | 0.1089 | 0.0016 | 1753 | 23 | 1766 | 30 | 1781 | 27 | 1781 | 27 |
| sam.16 | 0.4145 | 0.0033 | 0.3144 | 0.0043 | 4.8015 | 0.0837 | 0.1108 | 0.0016 | 1762 | 24 | 1785 | 31 | 1812 | 26 | 1812 | 26 |
| sam.17 | 0.3600 | 0.0021 | 0.3087 | 0.0040 | 4.6738 | 0.0778 | 0.1098 | 0.0016 | 1734 | 22 | 1763 | 29 | 1796 | 26 | 1796 | 26 |
| sam.18 | 0.4362 | 0.0034 | 0.3149 | 0.0041 | 4.9125 | 0.0821 | 0.1132 | 0.0016 | 1765 | 23 | 1804 | 30 | 1851 | 26 | 1851 | 26 |
| sam.19 | 0.2984 | 0.0019 | 0.3220 | 0.0043 | 4.8987 | 0.0833 | 0.1103 | 0.0016 | 1800 | 24 | 1802 | 31 | 1805 | 26 | 1805 | 26 |
| sam.20 | 0.2649 | 0.0014 | 0.3189 | 0.0041 | 4.8738 | 0.0814 | 0.1108 | 0.0016 | 1785 | 23 | 1798 | 30 | 1813 | 26 | 1813 | 26 |
| sam.21 | 0.6301 | 0.0015 | 0.3152 | 0.0041 | 4.9026 | 0.0813 | 0.1128 | 0.0016 | 1766 | 23 | 1803 | 30 | 1845 | 26 | 1845 | 26 |
| sam.22 | 0.2826 | 0.0011 | 0.3140 | 0.0041 | 4.8652 | 0.0819 | 0.1124 | 0.0016 | 1761 | 23 | 1796 | 30 | 1838 | 26 | 1838 | 26 |
| sam.23 | 0.2801 | 0.0012 | 0.3259 | 0.0042 | 5.0590 | 0.0845 | 0.1126 | 0.0016 | 1818 | 24 | 1829 | 31 | 1842 | 26 | 1842 | 26 |
| sam.24 | 0.4255 | 0.0014 | 0.3202 | 0.0043 | 4.9361 | 0.0837 | 0.1118 | 0.0016 | 1791 | 24 | 1808 | 31 | 1829 | 26 | 1829 | 26 |
| garnet bearing biotite granite sample 19-WC-13 | | | | | | | | | | | | | | | | |
| sam.01 | 0.5310 | 0.0045 | 0.3321 | 0.0043 | 5.1682 | 0.0931 | 0.1129 | 0.0018 | 1849 | 24 | 1847 | 33 | 1846 | 29 | 1846 | 29 |
| sam.02 | 0.4700 | 0.0052 | 0.3333 | 0.0044 | 5.2320 | 0.0962 | 0.1138 | 0.0018 | 1855 | 24 | 1858 | 34 | 1862 | 28 | 1862 | 28 |
| sam.03 | 0.9944 | 0.0072 | 0.3408 | 0.0044 | 5.4143 | 0.1119 | 0.1152 | 0.0021 | 1891 | 25 | 1887 | 39 | 1883 | 33 | 1883 | 33 |
| sam.04 | 0.9844 | 0.0135 | 0.3442 | 0.0046 | 5.5856 | 0.1007 | 0.1177 | 0.0017 | 1907 | 26 | 1914 | 35 | 1921 | 26 | 1921 | 26 |
| sam.05 | 0.4035 | 0.0036 | 0.3322 | 0.0048 | 5.1783 | 0.0955 | 0.1130 | 0.0018 | 1849 | 27 | 1849 | 34 | 1849 | 29 | 1849 | 29 |
| sam.06 | 0.5266 | 0.0077 | 0.3330 | 0.0044 | 5.2108 | 0.0910 | 0.1135 | 0.0017 | 1853 | 25 | 1854 | 32 | 1856 | 27 | 1856 | 27 |
| sam.07 | 0.3920 | 0.0018 | 0.3288 | 0.0044 | 5.1232 | 0.0896 | 0.1130 | 0.0017 | 1833 | 24 | 1840 | 32 | 1848 | 26 | 1848 | 26 |
| sam.08 | 0.4904 | 0.0024 | 0.3281 | 0.0043 | 5.1700 | 0.0897 | 0.1143 | 0.0017 | 1829 | 24 | 1848 | 32 | 1868 | 26 | 1868 | 26 |
| sam.09 | 0.5607 | 0.0021 | 0.3287 | 0.0042 | 5.1236 | 0.0856 | 0.1130 | 0.0016 | 1832 | 24 | 1840 | 31 | 1849 | 25 | 1849 | 25 |
| sam.10 | 0.4505 | 0.0016 | 0.3335 | 0.0044 | 5.2980 | 0.0977 | 0.1152 | 0.0018 | 1855 | 25 | 1869 | 34 | 1883 | 29 | 1883 | 29 |
| sam.11 | 0.4351 | 0.0031 | 0.3357 | 0.0045 | 5.2959 | 0.1164 | 0.1144 | 0.0022 | 1866 | 25 | 1868 | 41 | 1871 | 35 | 1871 | 35 |
| sam.12 | 0.4647 | 0.0036 | 0.3354 | 0.0045 | 5.3105 | 0.0937 | 0.1148 | 0.0017 | 1865 | 25 | 1871 | 33 | 1877 | 27 | 1877 | 27 |
| sam.13 | 2 | 0 | 50 | 31 | 6226 | 3929 | 1 | 1 | 25401 | 15796 | 8871 | 5598 | 5081 | 1171 |  |  |
| sam.14 | 0.4848 | 0.1961 | 0.3322 | 0.0045 | 5.1636 | 0.0927 | 0.1127 | 0.0017 | 1849 | 25 | 1847 | 33 | 1844 | 27 | 1844 | 27 |
| sam.15 | 0.4927 | 0.0070 | 0.3337 | 0.0044 | 5.1820 | 0.0951 | 0.1126 | 0.0018 | 1856 | 25 | 1850 | 34 | 1842 | 28 | 1842 | 28 |
| sam.16 | 0.5510 | 0.0040 | 0.3302 | 0.0044 | 5.1956 | 0.0982 | 0.1141 | 0.0018 | 1839 | 25 | 1852 | 35 | 1866 | 29 | 1866 | 29 |
| sam.17 | 6.0284 | 0.0659 | 0.3456 | 0.0045 | 5.9415 | 0.1352 | 0.1247 | 0.0026 | 1914 | 25 | 1967 | 45 | 2024 | 37 | 2024 | 37 |
| sam.18 | 0.9180 | 0.0091 | 0.3351 | 0.0045 | 5.2877 | 0.0999 | 0.1144 | 0.0019 | 1863 | 25 | 1867 | 35 | 1871 | 30 | 1871 | 30 |
| sam.19 | 0.4405 | 0.0036 | 0.3362 | 0.0044 | 5.2988 | 0.0956 | 0.1143 | 0.0018 | 1868 | 24 | 1869 | 34 | 1869 | 28 | 1869 | 28 |
| sam.20 | 0.4333 | 0.0079 | 0.3350 | 0.0044 | 5.2760 | 0.1042 | 0.1142 | 0.0019 | 1863 | 24 | 1865 | 37 | 1868 | 31 | 1868 | 31 |
| sam.21 | 0.4049 | 0.0044 | 0.3376 | 0.0044 | 5.3328 | 0.0933 | 0.1146 | 0.0017 | 1875 | 24 | 1874 | 33 | 1873 | 27 | 1873 | 27 |
| sam.22 | 0.9619 | 0.0123 | 0.3375 | 0.0044 | 5.3506 | 0.0944 | 0.1150 | 0.0017 | 1875 | 24 | 1877 | 33 | 1880 | 27 | 1880 | 27 |
| sam.23 | 0.4719 | 0.0070 | 0.3333 | 0.0044 | 5.2482 | 0.0958 | 0.1142 | 0.0018 | 1855 | 24 | 1860 | 34 | 1867 | 28 | 1867 | 28 |
| sam.24 | 0.5888 | 0.0045 | 0.3227 | 0.0041 | 5.1973 | 0.0883 | 0.1168 | 0.0017 | 1803 | 23 | 1852 | 31 | 1908 | 26 | 1908 | 26 |
| sam.25 | 0.5030 | 0.0054 | 0.3327 | 0.0043 | 5.2159 | 0.0915 | 0.1137 | 0.0017 | 1851 | 24 | 1855 | 33 | 1860 | 27 | 1860 | 27 |
| sam.26 | 0.5674 | 0.0061 | 0.3368 | 0.0044 | 5.4800 | 0.1118 | 0.1180 | 0.0021 | 1871 | 25 | 1897 | 39 | 1926 | 32 | 1926 | 32 |
| sam.27 | 0.4065 | 0.0019 | 0.3253 | 0.0045 | 5.2039 | 0.1053 | 0.1160 | 0.0020 | 1815 | 25 | 1853 | 38 | 1896 | 31 | 1896 | 31 |
| sam.28 | 0.4153 | 0.0065 | 0.3344 | 0.0046 | 5.2805 | 0.0961 | 0.1145 | 0.0018 | 1859 | 25 | 1866 | 34 | 1873 | 28 | 1873 | 28 |
| sam.29 | 0.7044 | 0.0109 | 0.3343 | 0.0044 | 5.2405 | 0.1044 | 0.1137 | 0.0020 | 1859 | 24 | 1859 | 37 | 1859 | 32 | 1859 | 32 |
